# Supplementary material
Source: PubMed Central journal article supplement (PMC5034302)
Supplement: mmc1.pdf [file mmc1.pdf]

**Biophysical Journal, Volume 111**

**Supplemental Information**

**A Dynamic Picture of the Early Events in Nociceptin Binding to the NOP  
Receptor by Metadynamics**

**Stefano della Longa and Alessandro Arcovito**

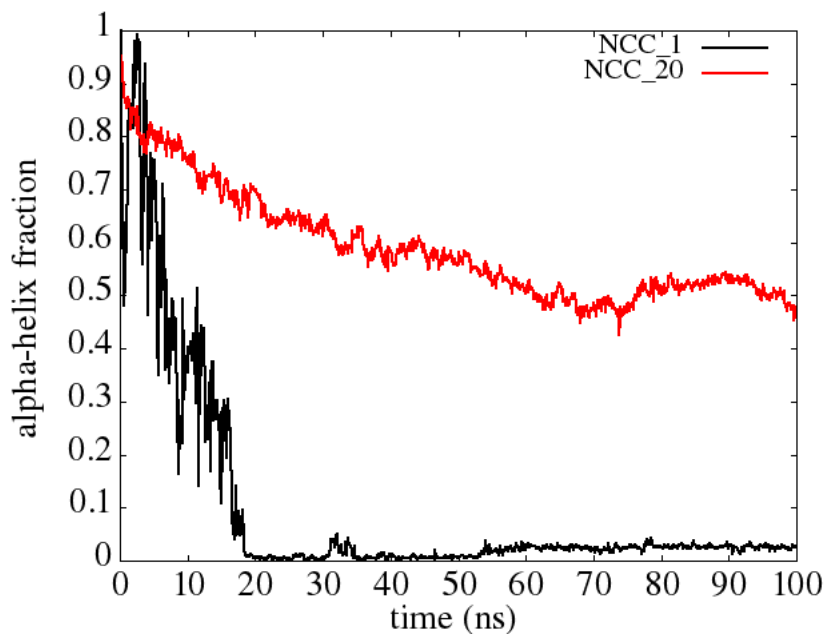

**Fig. S1.** Fraction of  $\alpha$ -helix content of NCC in water starting either from a single molecule (black curve), or a cluster of 20 NCC molecules (red curve) per 1600 water molecules. A partial  $\alpha$ -helix content is maintained much longer for clustered NCC molecules

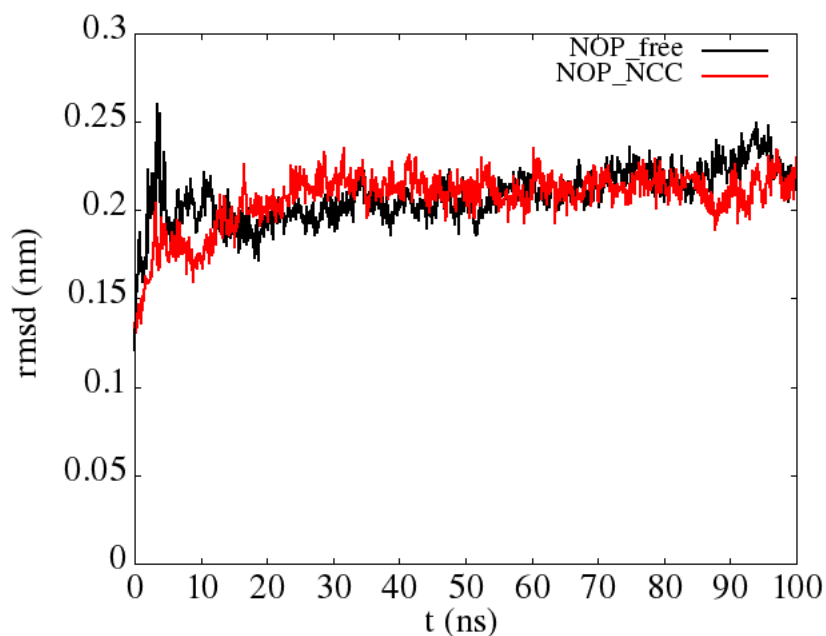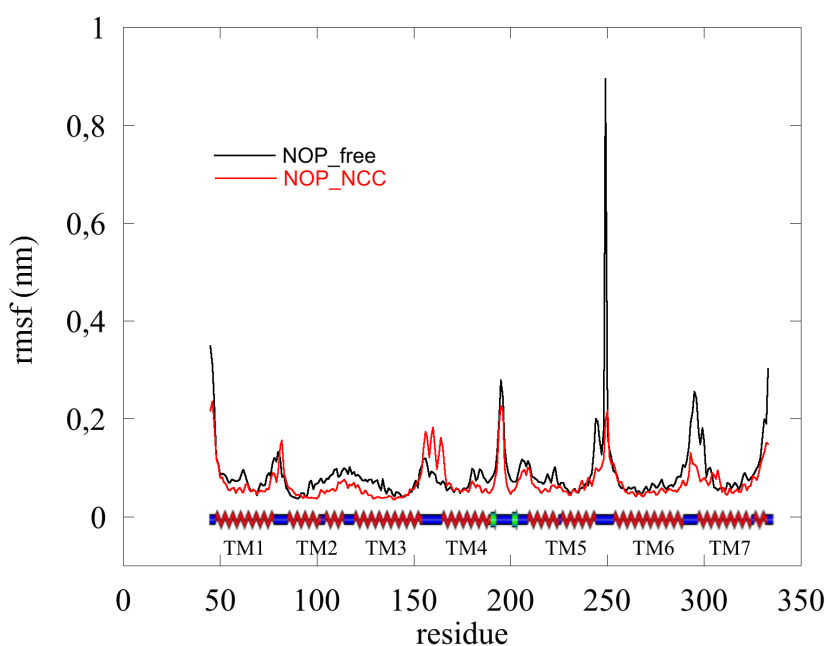

**Fig. S2.** Upper panel) RMSD plot of a 100 ns trajectory for free (black curve) and NCC bound (red curve) NOP. Lower panel) RMSF of residues of the same molecules. The NOP\_NCC structure is the starting one obtained by rigid docking, before metadynamics.

A)

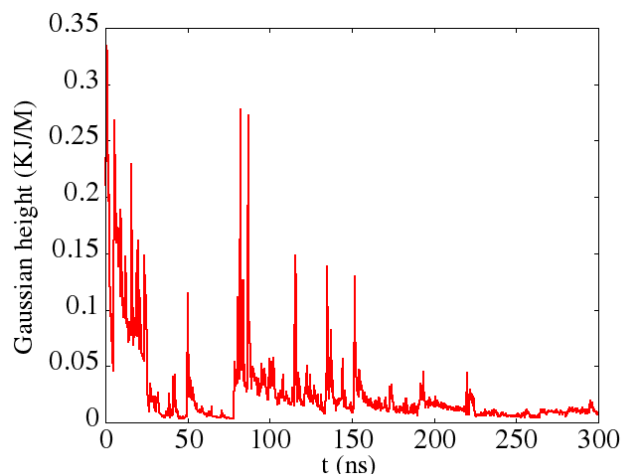

B)

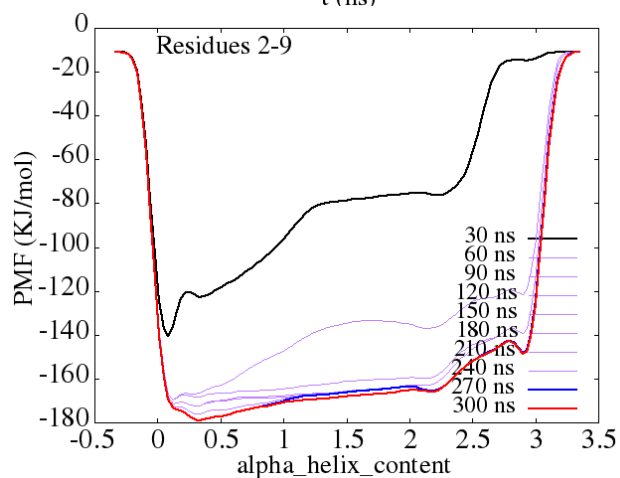

C)

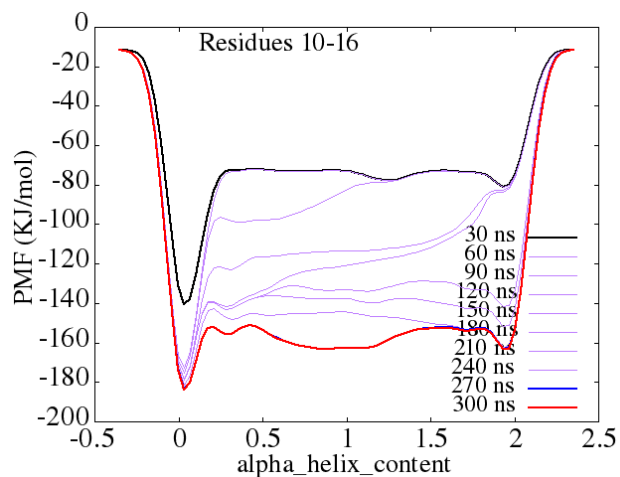

**Fig. S3.** Well-tempered metadynamics of the NOP\_NCC complex as a function of NCC  $\alpha$ -helix content. A) Gaussian heights added along the trajectory. B) and C) Projections of the FES averaged along the first and second collective variable, respectively.

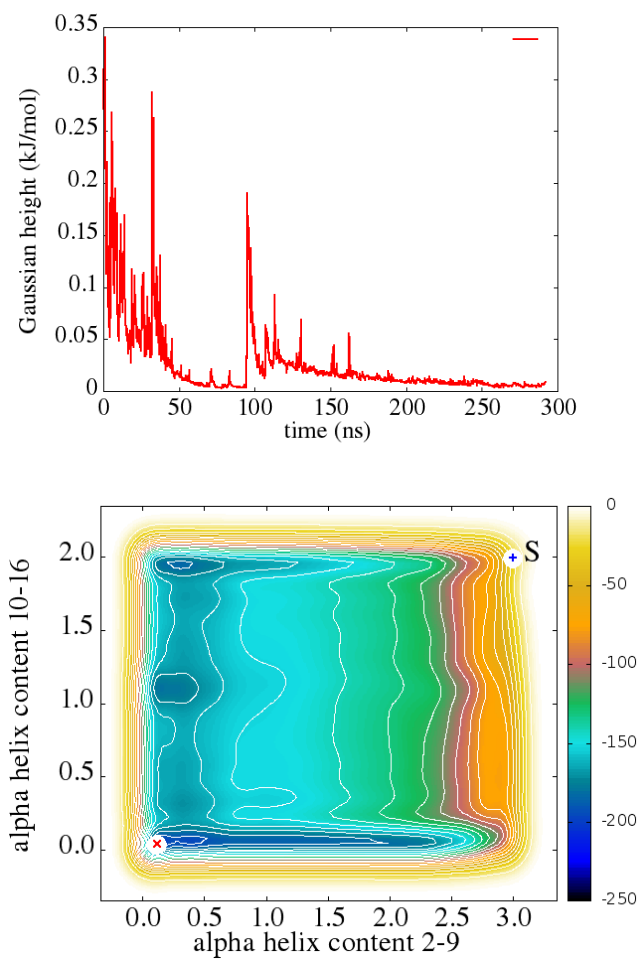

**Fig. S4.** Well-tempered metadynamics of the N133A 'in silico' mutant as a function of NCC  $\alpha$ -helix content. A) Gaussian heights added along the trajectory. B) Bidimensional FES .

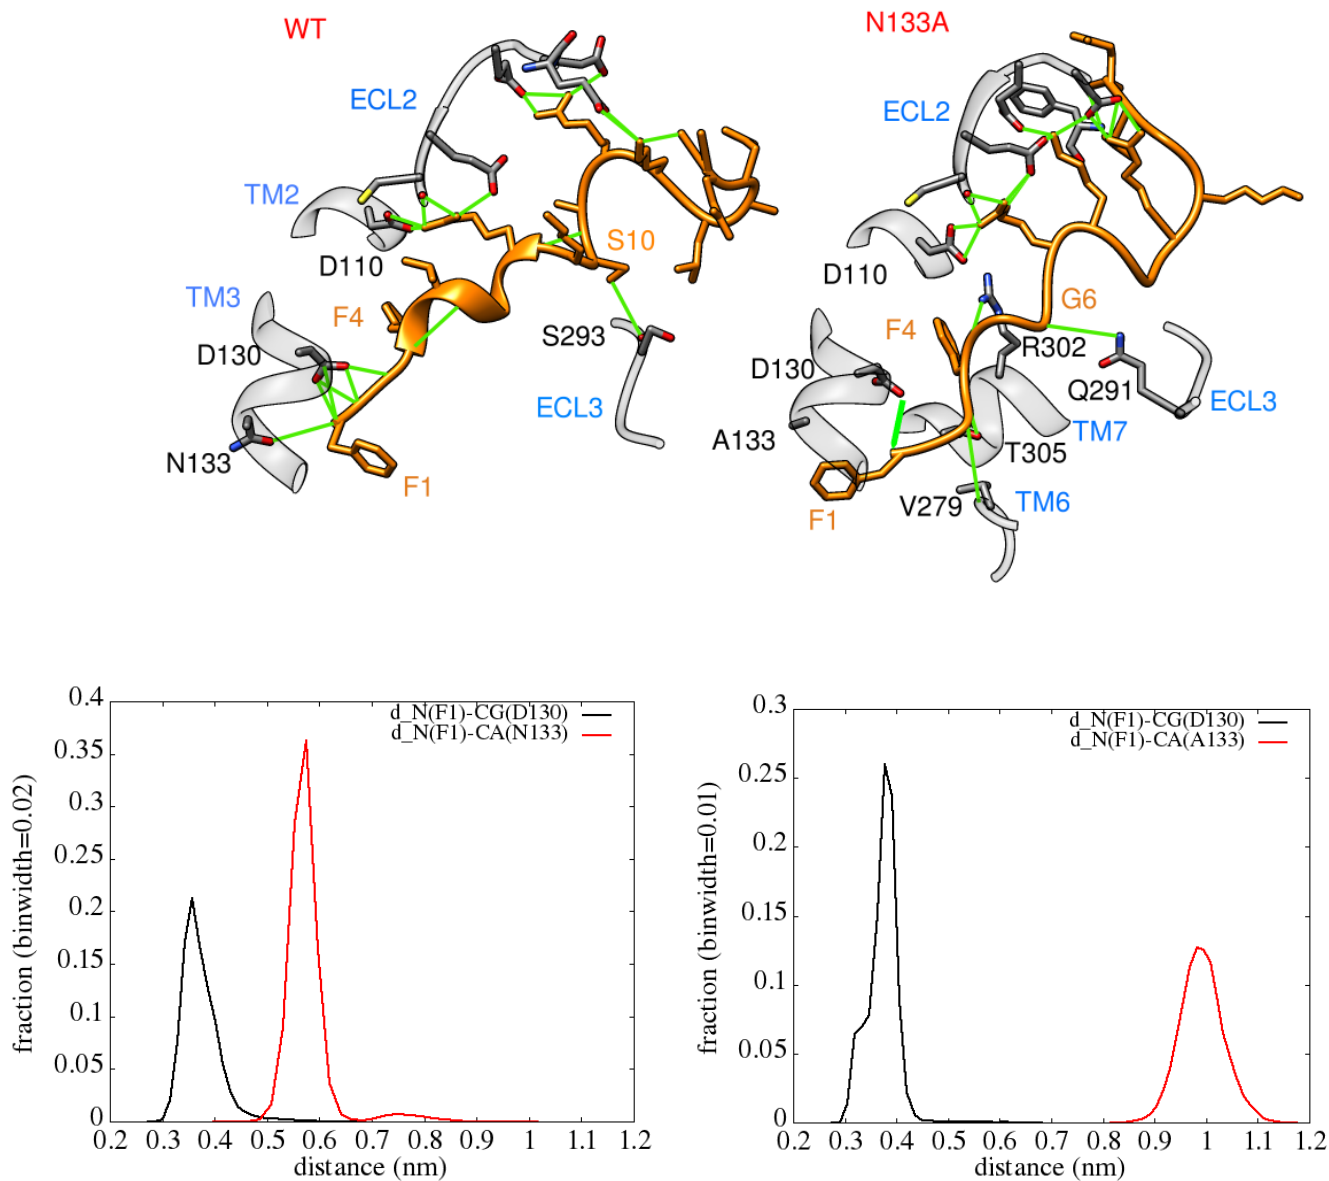

**Fig. S5.** Comparison between the representative structures corresponding to the FES absolute minima (State<sub>1</sub>) obtained for the WT (left) and N133A 'in silico' mutant (right) NOP-NCC complex. The distributions of the distances  $d_{N(F1)-CG(D130)}$  and  $d_{N(F1)-CA(N/A133)}$  along the metadynamics trajectory is shown in the bottom frames, showing that in the absence of the N133 bond, NCC still forms H-bond with D130, but penetrates less inside the binding pocket.

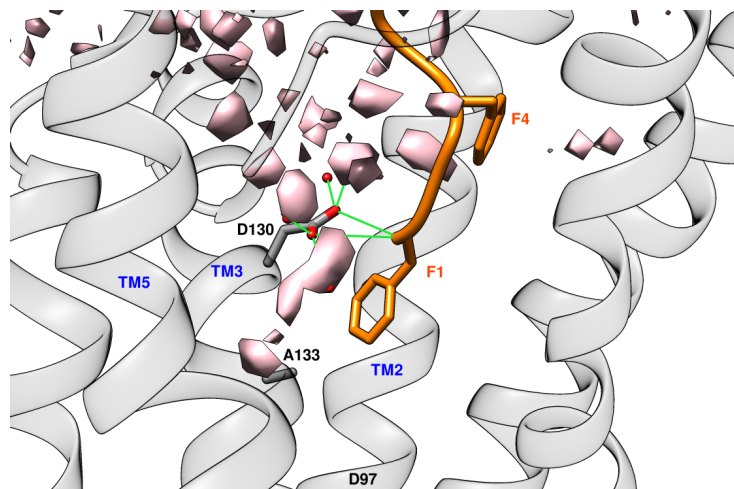

**Fig. S6.** Water density (pink) and H-bond network calculated for the N133A NOP-NCC complex: In the absence of the N(F1)-OD1(N133) bond, water penetrates deeper inside the binding site, restoring interactions with D130.

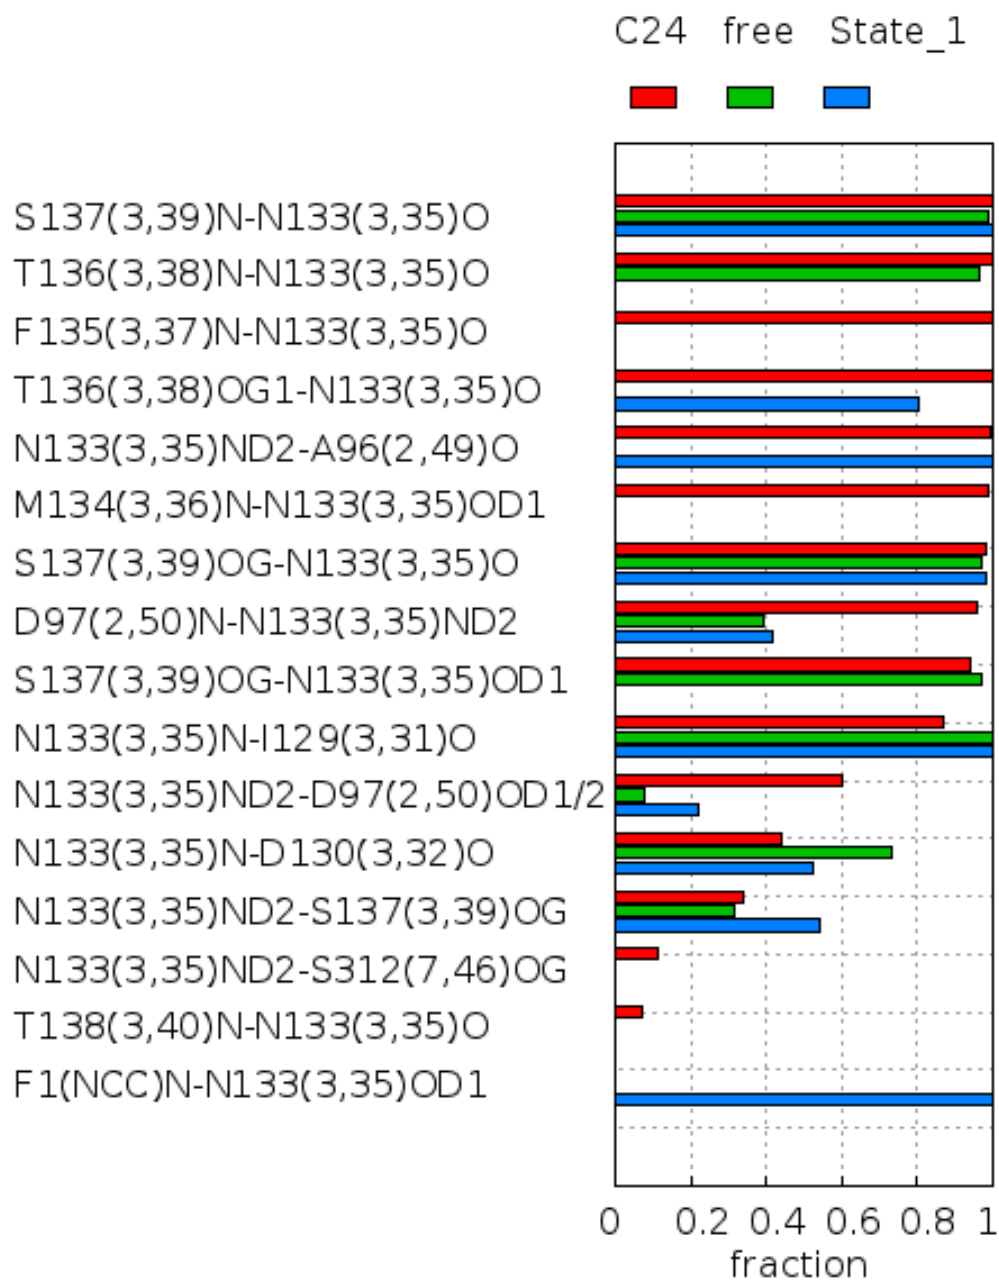

**Fig. S7.** Hydrogen bonds formed by N133 along the trajectories of NOP-C24 complex (red), NOP\_free (green) and NOP-NCC (cyan). Values of persistence of the H-bonds in the histogram are expressed as fraction of the trajectory. The histogram enlightens the destabilization of H-bonds between N133 and (M134, F135, T136) i.e. the perturbation of the TM3 helix segment in the NOP-NCC complex



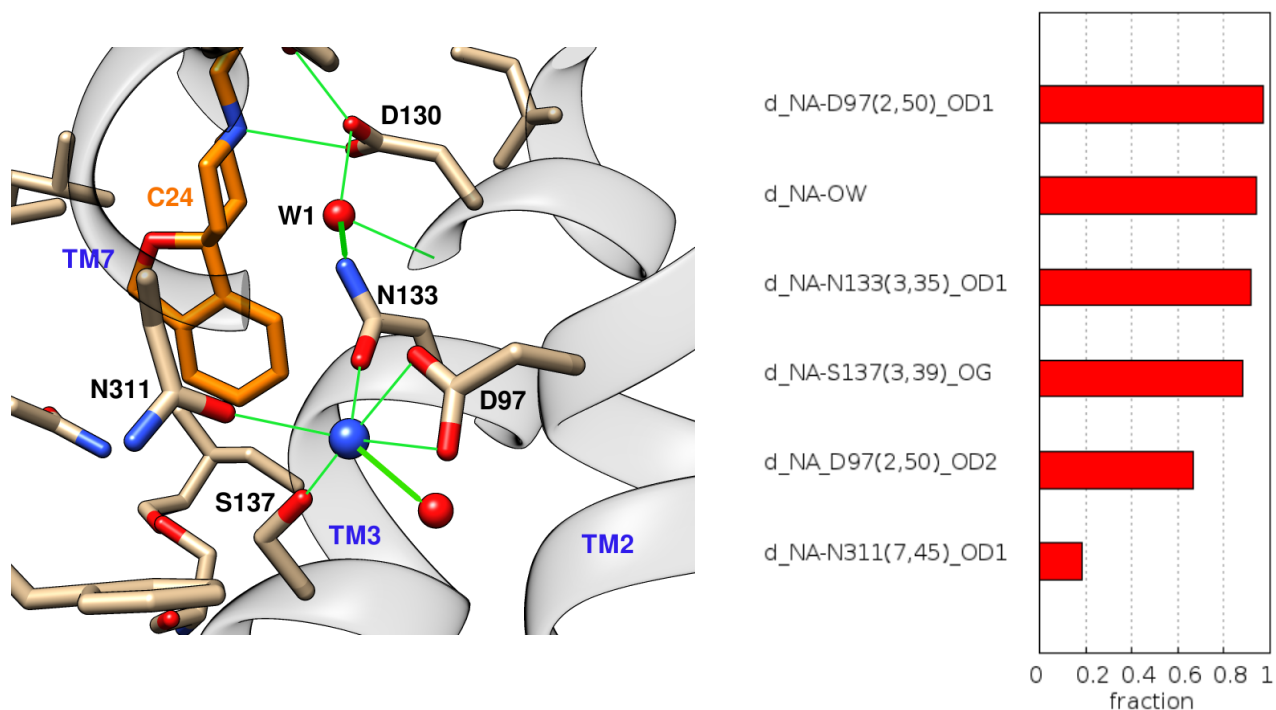

**Fig. S8.** Stability of the proposed allosteric binding site of sodium (colored blue), as probed by 100 ns MD of the NOP\_C24 complex: the sodium ion has been put in place of water W2 (left panel). As shown in the right panel, it forms a quite stable (91%) salt bridge with N133(3,35), with D97(2,50) (OD1 97%, OD2 67%), S137(3,39)\_OG (88%), N311(7,45)\_OD1 (18%), and with another structural water molecule (93%).
