# Supplementary material
Source: PubMed Central journal article supplement (PMC5034302)
Supplement: mmc2.pdf [file mmc2.pdf]

# A Dynamic Picture of the Early Events in Nociceptin Binding to the NOP Receptor by Metadynamics

Stefano della Longa<sup>1,\*</sup> and Alessandro Arcovito<sup>2</sup>

<sup>1</sup>Department of Life, Health and Environmental Sciences, University of L'Aquila, L'Aquila, Italy; and <sup>2</sup>Institute of Biochemistry and Clinical Biochemistry, Catholic University of Sacred Heart, Rome, Italy

**ABSTRACT** Nociceptin (NCC, also known as FQ (N/OFQ)) is the 17-amino acid neuropeptide, endogenous ligand for the G-protein-coupled receptor (NOP, also known as ORL-1). In this study, starting from the recently reported x-ray structure at pH 7 of NOP in complex with an antagonist, new insights, to our knowledge, on the binding geometry of NCC to NOP have been provided *in silico*. After a rigid docking of NCC in an  $\alpha$ -helix conformation, molecular dynamics (MD) and metadynamics (METAD), a method for the analysis of free-energy surfaces (FES), were performed on the protein-peptide complex. Free-energy profiles were obtained as a function of the  $\alpha$ -helix content of different segments of the 17-mer ligand, and a structural ensemble of conformations of NCC, corresponding to the minimum of the FES, was extracted, thus representing the NCC bound to the inactive form of NOP. The structural features were compared with many known experimental data. The pose of the “message” domain (residues 1–4) of NCC differs from that of the known NOP antagonists, as being slightly slipped deeper inside the protein core. A residual  $\alpha$ -helix content in the central part of the peptide (residues 4–9) is maintained, whereas the C-terminal segment (residues 13–17) is unstructured and highly flexible. An important stabilization due to interactions with residues D130 and D110 of the receptor has been found, in agreement with the large decrease in agonist potency reported for the D130A and D110A mutants. The importance of the extracellular domain 2 (ECL2) in the selectivity toward the endogenous ligand has been confirmed. A pivotal role for the conserved residue N133 is suggested and further supported by a study of the N133A *in silico* mutant. Accordingly, N133 can work as a molecular microswitch driving the change between the inactive and active NOP conformations, in the framework of an extended H-bond and water network rearrangement in the deep binding site.

## INTRODUCTION

Nociceptin/orphanin FQ (N/OFQ; hereafter NCC) (1,2) is an endogenous 17-mer peptide (with sequence FGGFTG ARKSARKLANQA) involved in a wide range of physiological responses, with effects noted in the nervous system (central and peripheral), the cardiovascular system, the airways, the gastrointestinal tract, the urogenital tract, and the immune system (3,4). Its receptor, the G-protein-coupled nociceptin/orphanin FQ receptor (NOP), is considered a drug target with broad therapeutic potential (5). Activation of the NOP results in the inhibition of cAMP synthesis and the increase of membrane permeability to  $K^+$ , as in the canonical way of the overall class of opiate receptors.

Deciphering the structure of the NOP\_NCC complex would be very important to unravel the details of its *in vivo* function, however this aim remains relatively elusive. X-ray diffraction data of the NOP in complex to some potent

stabilizing antagonists have recently been published (6,7), but neither crystallographic nor NMR data have been reported with respect to NOP-agonist complexes or the free receptor. Concerning the transition from the inactive to the active form of the receptor, actually the “ionic lock” identified in the inactive form of rhodopsin (8) by the residues forming the Asp-Arg-Tyr (DRY) motif of TM3 (conserved in the opioid receptor family) and an acidic residue of TM6, is not observed in the crystallized NOP\_C24 complex (6). Concerning the NCC structure alone, NMR solution measurements are consistent with a random coil conformation in water, whereas a relatively more stable helix conformation from residues 4–17 in membrane-like environment (trifluoroethanol and SDS micelles) was observed (9). According to the received view, the N-terminal residues of NCC would constitute the “message” domain of the agonist, entering deeply in the binding pocket, and responsible for its efficacy in dose-response experiments, whereas the central and C-terminal segment of NCC constitute the “address” domain, interacting with the residues on the receptor surface and responsible for selectivity between different ligand

Submitted March 29, 2016, and accepted for publication July 5, 2016.

\*Correspondence: stefano.dellalonga@univaq.it

Editor: Amedeo Caffisch

<http://dx.doi.org/10.1016/j.bpj.2016.07.004>

© 2016 Biophysical Society.

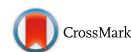

molecules (10). A recent molecular dynamics (MD) study (11), based on the assumption that NCC interacts with the membrane environment before binding with its receptor, used an  $\alpha$ -helix structure of the peptide as ligand in rigid-docking calculations toward the putative binding site of NOP, followed by equilibration with MD of the ligand-protein-membrane system.

However, there is no evidence that NCC interacts with the membrane environment before binding to the receptor (i.e., the access to the binding pocket is from the solvent). Thus, either the  $\alpha$ -helix content of NCC arises just within the binding pocket, starting from a random-coil structure in extracellular environment, or NCC reaches its receptor with at least a partial  $\alpha$ -helix content. There is no report on NCC storage and processing in axon terminals and synapses. However, by analogy with what is known for dynorphin (12), it is likely that NCC and/or its precursor pronociceptin are stored in the synaptic vesicles as oligomers, where an  $\alpha$ -helix structure could be maintained, protected from the destabilizing polar interactions of the cytosol. Thus  $\alpha$ -helix structure destabilization would occur in a time interval corresponding to the particle diffusion within the synaptic cleft ( $d \sim 30$ – $100$  nm). This time can be estimated by the Einstein equation  $t = d^2/D$ , where  $D$  is the diffusion constant (for dynorphin the measured constant  $D$  is  $\sim 1.7 \cdot 10^{-6}$  cm<sup>2</sup>/s), being  $\sim 200$  ns. We performed two preliminary 100 ns MD calculations to test the  $\alpha$ -helix stability of NCC in water (Fig. S1 in the Supporting Material), where the fraction of  $\alpha$ -helix content is featured using the function described in Materials and Methods. According to these calculations, the  $\alpha$ -helix content drops to zero in less than 20 ns, hence a diffusion time of the order of hundreds of nanoseconds should be long enough to completely destabilize the NCC  $\alpha$ -helix structure. However, in a crowded environment (i.e., 60 mM clustered NCC molecules), the secondary structure could be maintained much longer, allowing entering the binding pocket with an at least partially structured conformation.

Starting from these considerations, we investigated the docking of NCC to NOP and evaluated the energy landscape as a function of the  $\alpha$ -helix content, i.e., using an alternative approach with respect to the one by Kothandan et al. (11), to determine the structure and dynamics of the NOP\_NCC complex. We started by using a rigid docking of NCC ( $\alpha$ -helix) into the NOP receptor, followed by a short equilibration (20 ns) by classical MD. Then, we applied the metadynamics (METAD) method to extract the free-energy minimum of the NCC conformations inside the binding pocket as a function of its  $\alpha$ -helix degree, using biased collective variables built for this purpose (13). Finally, we tested the stability and the unbiased dynamics of a representative configuration extracted from the minimum of the free-energy landscape. Our METAD results have been compared with the known structure of NOP in complex with the antagonist compound C24 (6), and with the MD simulation of the NOP\_free. A

detailed analysis of the  $\alpha$ -helix content, the hydrophobic environment, and the hydrogen bond network including the rearrangement of structural waters around the message and the address domain of NCC have been provided, suggesting the role of the asparagine 133 (N133<sup>3,35</sup> in the Ballesteros-Weinstein notation (14)) as a molecular micro-switch related to the stability between the inactive and active conformations of the receptor. This hypothesis has been further investigated by the analysis of the free-energy surfaces (FES) of the in silico mutant N133A that has been built for the purpose.

## MATERIALS AND METHODS

### Model setup of the NOP receptor

The initial structure of the NOPR was built starting from the recently reported x-ray crystal structure of the receptor in complex with a peptide mimetic (PDB: 4EA3) (6). Residues 155–163 belonging to a coil in the intracellular side, and side-chain atoms lacking in the reported structure due to structural disorder, were added and minimized “in vacuum” by using the Modeler and Rotamer modules in the Chimera UCSF package (15).

### Docking of NCC to NOP and setup of the protein-peptide complex

We set up an  $\alpha$ -helix-structured NCC peptide by the Chimera UCSF package (15), and then we attempted a protein-protein rigid docking using the Zdock server (16). From the output of the server, according to the received view that F1(NCC) is involved in H-bond with D130<sup>3,32</sup>, a model having the minimal distance between F1(NCC) and D130<sup>3,32</sup> (NOPR) was chosen as a starting model for MD setup. The protonation state of the ND1 and NE2 atoms of the histidines was chosen as suggested by the crystallographic structure, i.e., ND1(H79<sup>1CL1</sup>) and NE2(H154<sup>1CL2</sup>) were protonated, resulting in a charge of +6 (NOPR) and +4 (NCC). The highly conserved disulfide bond between C123<sup>3,25</sup> and C200<sup>ECL2</sup> of the protein was properly kept fixed during the MD runs. This disulfide bridge anchors the extracellular side of the TM3 helix near the binding site, therefore limiting the extent of conformational changes around this region during receptor activation (17).

### Classical molecular dynamics

Classical MD simulations were performed with the GROMACS 4.6 package (18,19) under the AMBER parm99sb force field (20) at the full atomistic level using a TIP3P water solvent and an explicit preequilibrated phospholipid bilayer of 128 POPC (1-palmitoyl-2-oleoyl-sn-glycero-3-phosphocholine) molecules obtained from P. Tieleman’s University of Calgary website (<http://moose.bio.ucalgary.ca>). Lipids were packed and energy-minimized around an embedded, strongly constrained protein structure, at the proper density (area per lipid) of  $\sim 0.63$  nm<sup>2</sup> using the INFLATEGRO procedure, following the same steps as described in (11). The protein-peptide-membrane system was then solvated in a triclinic water box (having basis vectors lengths of 7, 7.4, and 9.3 nm) under periodic boundary conditions, for a total number of 40,000 atoms (6400 solvent molecules) and a total charge +10. This positive charge was neutralized by randomly substituting water molecules with 44 Na<sup>+</sup> ions and 54 Cl<sup>-</sup> ions, to obtain neutrality with 0.15M salt concentration. A sketch of the full minimized system is displayed in Fig. 1.

Following a steepest descent minimization, the system was equilibrated in canonical ensemble (NVT) conditions for 300 ps, using a V-rescale,

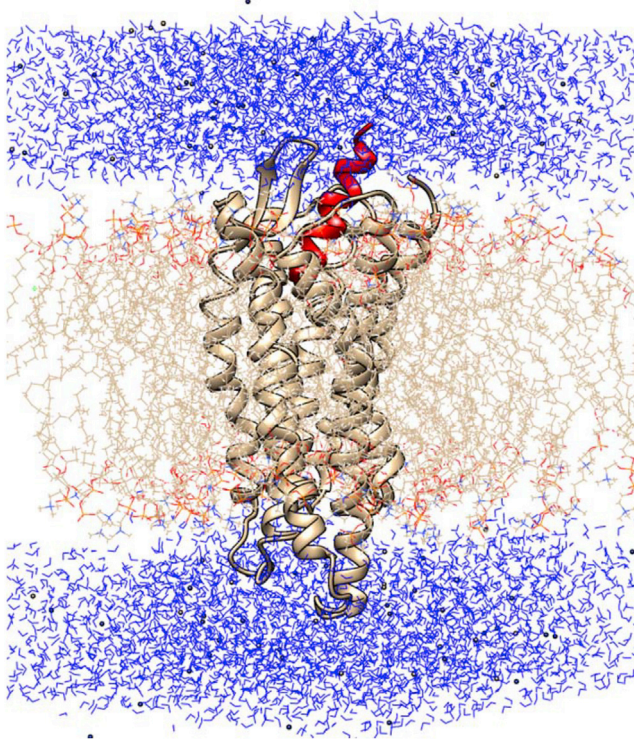

FIGURE 1 Setup of the starting system (State\_0) obtained after rigid docking of NCC for the simulation: NOP receptor (*beige ribbons*), NCC (*red ribbon*), the lipid (*beige wires*), and water (*blue*). To see this figure in color, go online.

modified Berendsen thermostat (21) with position restraints for both the protein-peptide complex and the lipids, and thereafter in a isothermal-isobaric ensemble (NPT) for 500 ps, applying position restraints to the heavy atoms of the protein-peptide complex, and using a Nose-Hoover thermostat (22,23) and a Parrinello-Rahman barostat (24) at 1 Atm with a relaxation time of 2.0 ps. Finally, all restraints were removed, and MD runs were performed under NPT conditions at 300 K with a T-coupling constant of 1 ps. Van der Waals interactions were modeled using 6–12 Lennard-Jones potential with a 1.2 nm cutoff. Long-range electrostatic interactions were calculated, with a cutoff for the real space term of 1.2 nm. All covalent bonds were constrained using the LINCS algorithm. The time step employed was 2 fs, and the coordinates were saved every 5 ps for analysis, which was performed using the standard GROMACS tools.

## Metadynamics

The conformational space of the docked NCC was explored by METAD (25) in the well-tempered ensemble (WTE) (26). The METAD algorithm uses a set of collective variables (CVs)  $s_i$  ( $i = 1, \dots, N_{CVs}$ ), which are functions of the coordinates of the system. Such coordinates are evolved along a standard MD trajectory, supplemented by a history-dependent potential that add penalties to the system discouraging it from visiting previously sampled conformations. The WTE is an ensemble designed to have the same energy of the canonical ensemble, but with much larger fluctuations. It has been demonstrated that the use of the WTE avoids bias overloading, and accelerates convergence of the METAD runs by even orders of magnitude (26).

The PLUMED 2.1 package (21) was patched to the GROMACS engine to carry out our METAD runs. As in the standard implementation, the history-dependent potential is built by using Gaussians of  $N_{CVs}$ -th dimension, height  $w$ , and widths  $\delta s_i$ , and deposited at time intervals  $\tau_G$  along the CVs

trajectory. The choice of the  $w$ ,  $\delta s_i$ , and  $\tau_G$  parameters is crucial to obtain an accurate reproduction of the FES in reasonable time, and their proper values are given just after the definition of the chosen collective variables. As long as the METAD simulation runs, the sum of these penalty terms tends to compensate exactly the underlying FES in the reduced space, thus allowing a reconstruction of the FES explored up to time  $t$  (27).

We selected as collective variables (CVs) the  $\alpha$ -helix content of NCC between residues 2–9 (CV1) and 10–16 (CV2). This kind of collective variables is based on the work by Pietrucci and Laio (13), using the set of root mean square (RMS) distances of every six contiguous residues in a chosen segment of a protein chain from an ideal  $\alpha$ -helix configuration. This is done by calculating the following function:

$$CV_x = \sum_i \frac{1 - (RMSD_i/r_0)^8}{1 - (RMSD_i/r_0)^{12}},$$

with the  $i$  index running over all possible segments of  $\alpha$ -helix defined in the chosen sequences (3 for the 2–9 segment, and 2 for the 10–16 segment), and  $r_0 = 0.08$  nm. Thus the CVs go to 0 when the root mean square deviation (RMSD) values approach  $r_0$ , go to 3(CV1) or 2(CV2) when these segments form a full  $\alpha$ -helix structure, and range from 0 to 1 for every segment of six residues. The height  $w$  of the Gaussian parameter was chosen to be 0.32 kJ/mol according to values found in literature (28) as a compromise between accuracy and speed of the FES scanning; the widths  $\delta s_1$  and  $\delta s_2$ , as an empirical rule were taken to be one-third of the fluctuations of each CV in a free MD run; hence they were chosen to be 0.1 for both CV1 and CV2. The pace time  $\tau_G$  for deposition of the bias was 0.5 ps.

## RESULTS

### MD simulation of State\_0

After the rigid docking of NCC ( $\alpha$ -helix) into the NOP receptor, as described in the Materials and Methods, the resulting configuration of the NOP\_NCC complex (hereafter “State\_0”) was subjected to a MD protocol.

The C-alpha RMSD plot of two 100 ns MD simulations relative to the free (NOP\_free) and NCC docked (NOP\_NCC) receptor show stability of the backbone after 30–40 ns with a RMSD of 0.2–0.25 nm maximum for both the trajectories (Fig. S2, upper panel). The presence of NCC induces a decrease of the flexibility of ECL1, ICL3, and TM7, and an increase for ICL2 as shown by the calculated root mean square fluctuation (RMSF) per residue (C-alpha) (Fig. S2, lower panel). However, the docked NCC also shows a high degree of flexibility, undergoing multiple changes in the  $\alpha$ -helix content along the trajectory, and exchanging its interactions with the external residues placed on the surface of the receptor. In Fig. 2 (left panel), the  $\alpha$ -helix content of five segments of NCC, relative to residues 2–7, 4–9, 6–11, 8–13, and 10–15 are monitored along three independent 100–160 ns MD trajectories, shown as concatenated ones in the figure. It is evident, by inspecting the figure, that all segments show a certain degree of instability of the secondary structure, the central one being more stable with respect to the C-terminal and N-terminal segments. The evolution of several important hydrogen bonds is displayed on the right panel of Fig. 2, showing for example the interaction of N(F1) of NCC with OD1/2

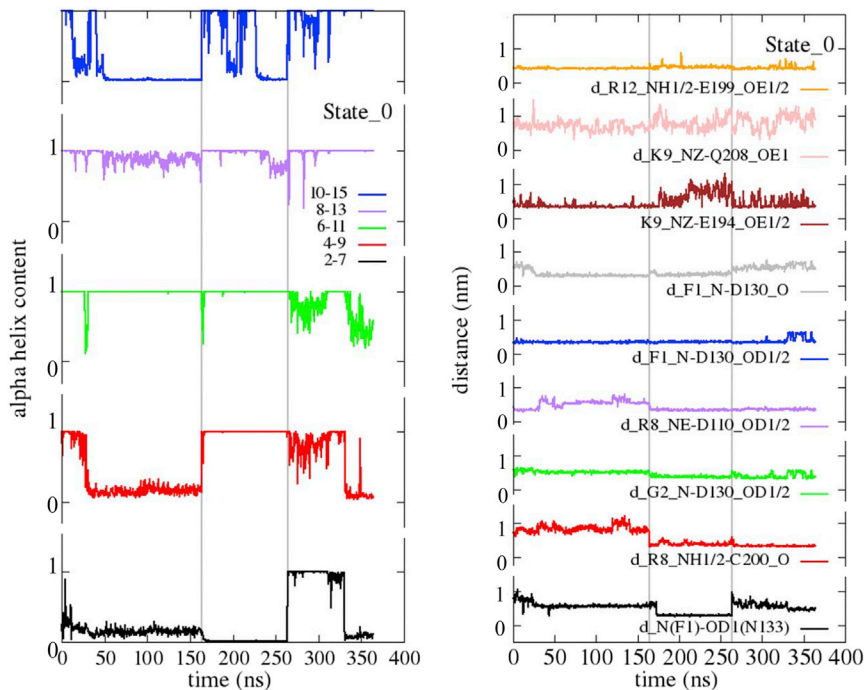

FIGURE 2 (Left panel)  $\alpha$ -helix content of different segments of NCC after rigid docking to NOP (State\_0) and along classical MD trajectories. Three independent MD trajectories (100–160 ns long, concatenated in the figures) were followed, and the  $\alpha$ -helix content was calculated for residues 2–7, 4–9, 6–11, 8–13, and 10–15. The  $\alpha$ -helix content of each segment varies from 0 to 1. The vertical lines indicate the restart of the trajectories. (Right panel) Formation of important hydrogen bonds along the same trajectories are shown. To see this figure in color, go online.

(D130<sup>3,32</sup>) and OD1(N133<sup>3,35</sup>) of NOP. As a general procedure, we have considered the flipping of equivalent donor or acceptor atoms forming the hydrogen bond, by monitoring the carbon atom of the same functional group. In the former case the contribution of OD1 and OD2 atoms of aspartate to the hydrogen bonds with N(F1) is averaged by considering the distance with the CG atom of the aspartate (Fig. 2, right panel). It emerges from the figure that several hydrogen bonds are unstable all along the trajectories; the formation/breaking of several of them being related to thermal fluctuations of the local  $\alpha$ -helix content of NCC; moreover, the tendency to interact more deeply inside the receptor, reaching sometimes the very central N133<sup>3,35</sup> residue of NOP (black curve), was intriguing, as this residue is the closest one to the intracellular side that directly interacts with the agonist.

These results are different from those by Kothandan et al. (11), which showed a more external position of the message domain, probably due to a different choice between the resulting poses of the rigid docking procedure. Interestingly, in both calculations the message domains move during the MD trajectory from the initial position going inner inside the binding site. As explained in Materials and Methods, the pose we chose, with the message domain of the peptide being as close as possible to the inner core of the binding pocket, and thereafter subjected to a short MD equilibration, constituted only the starting conformation of the NOP\_NCC complex that was further investigated by the METAD protocol. By the way, these preliminary MD results support a dynamic picture of the NOP\_NCC interaction and resemble the recently reported liquid-state NMR spectroscopy data

on the structure of the dynorphin (1–13) peptide bound to the human  $\kappa$ -opioid receptor (KOR) (29).

## Metadynamics

A deeper investigation of the conformational landscape of the docked NCC in complex with NOP was undertaken using METAD. A well-tempered protocol (described in Materials and Methods) was attempted in a bidimensional space. We used the  $\alpha$ -helix content of the NCC segments 2–9 (CV1) and 10–16 (CV2) as two independent biased collective variables. In the Fig. 3 diagram, the  $\alpha$ -helix content of segment 2–9 can vary from 0 to 3, and the  $\alpha$ -helix content of segment 10–16 can vary from 0 to 2. We started from the structure obtained after an early equilibration (20 ns) of the NOP\_NCC complex (State\_0), where NCC maintains a full  $\alpha$ -helix content (position [2, 3] of the bidimensional FES diagram). The protocol lasted 300 ns; the Gaussian heights deposited along the trajectory are reported in Fig. S3 A; the added biases tend to zero indicating that the calculation in the WTE has converged and the FES has been fully reproduced. In Fig. 3, the final bidimensional FES diagram is reported as a function of the two collective variables. It shows the absolute minimum at position [0.3, 0.03] that is identified as State\_1. The structural ensemble of bound NCC structures, belonging to State\_1, are depicted in the figure having energies corresponding to the calculated free-energy minimum, ( $-190.4 \pm 2RT$ ) kJ/mol where  $RT = 2.4794$  kJ/mol. The projections of the averaged FES along CV1 (Fig. S3 B) and CV2 (Fig. S3 C), obtained as a function of the simulation time, show again the convergence

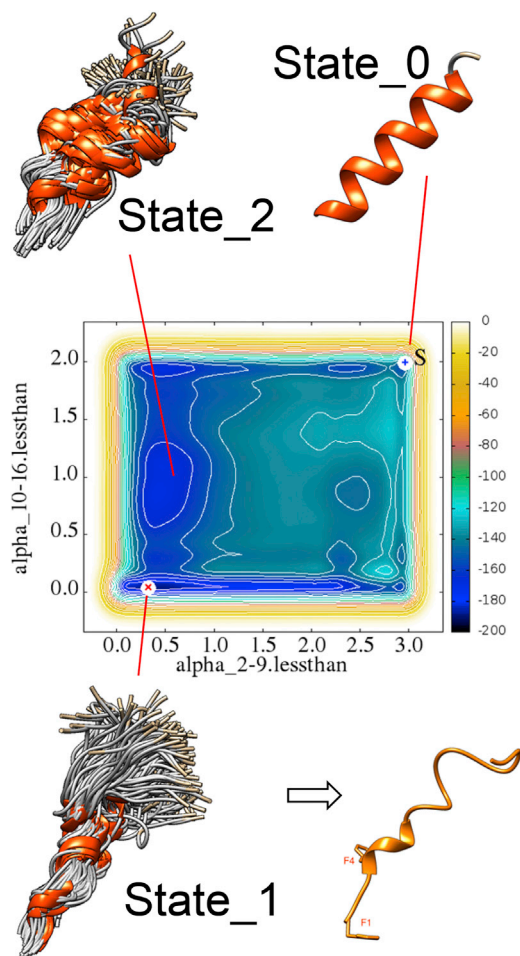

FIGURE 3 Well-tempered METAD of the NOP\_NCC complex as a function of NCC  $\alpha$ -helix content. Clusters corresponding to the absolute minimum (State\_1) and a local minimum (State\_2) are shown, together with the starting structure (State\_0), and the representative structure of State\_1 extracted by clustering analysis (bottom right). To see this figure in color, go online.

of the METAD protocol: in fact, the two free-energy profiles at 270 ns (blue curves) and 300 ns (red curves) are almost indistinguishable for both CVs. From the visual inspection of the FES and its projections, it is also evident that the conformational landscape of the two CVs around the minimum is quite different. A deep minimum exists for the external segment (Fig. S3 C), residues 10–16, with  $\alpha$ -helix content  $0.03 \pm 0.03$ , the error being evaluated taking all the structures with energy values around the minimum + 2RT). This result clearly points toward an absence of  $\alpha$ -helix content in secondary structure for this segment. On the contrary a certain degree of secondary structure of the internal segment (residues 2–9) is present, as demonstrated (Fig. S3 B) by a flat minimum around an  $\alpha$ -helix content of  $0.3 \pm 0.2$ , ten times higher than the former one. A third minimum (State\_2) is also depicted in Fig. 3 at position [0.5, 0.96]; however, this state seems not reachable from the absolute minimum (State\_1) through thermal fluctuations, as it is

$\sim 10$  RT higher in energy (about  $-166$  kJ/mol). Finally, State\_0 is also a local minimum of the FES, with an energy of about  $-145$  kJ/mol, a fact that explains the partial stability of the NCC  $\alpha$ -helix observed in the aforementioned MD simulations (Fig. 2, left panel; (11)). Moreover, the energy difference between State\_0 and State\_1,  $+45$  kJ/mol, is reasonable as compared with the estimated affinity of NCC to NOP, i.e.,  $K_i = 0.93$  nmol,  $\Delta G = -51.8$  kJ/mol (30).

The representative structure in State\_1 (Fig. 3, bottom right), chosen as central structure after single linkage clustering method, has been further investigated as well as State\_0, by classical MD.

### Molecular dynamics of State\_1

In Fig. 4 (left panel), the evolution of the  $\alpha$ -helix content of the same NCC segments 2–7, 4–9, 6–11, 8–13, and 10–15 as in Fig. 2 is calculated starting from State\_1, along each one of the repeated MD trajectories (concatenated in the figure). Rapid exchanges between multiple  $\alpha$ -helix configurations of the bound peptide are still observed in agreement with the flat minimum calculated in the FES; as expected, the behavior of the curves is similar to those relative to State\_0, with the main fraction of the  $\alpha$ -helix content placed in the central segment between F4 and A11.

In Fig. 4 (right panel), the evolution of the more stable hydrogen bonds formed between NCC and NOP along the four repeated trajectories starting from State\_1 are shown, and a more extensive list of them is given in Table 1. Not surprisingly, residues 14–17 of NCC interact weakly with NOP; in fact, they do not form H-bonds present more than 15% of the simulation time. This result is in agreement with the experimental finding that the synthetic fragment NCC(1–13)-NH<sub>2</sub> is active as well as NCC (31).

In the following we will discuss the representative structure of State\_1, depicted in the bottom right of Fig. 3. The environment around the message domain, i.e., the N-terminal residues 1–4 (FGGF) of NCC, is depicted in Fig. 5 (where NCC is orange) in two different orientations, focused on residues F1 (upper panel) and F4 (lower panel). The message domain of the endogenous agonist, thought to be mainly responsible for efficacy in dose-effect experiments, is buried in the same hydrophobic pocket created by residues of helices TM3, TM5, and TM6 that surround the C24 and C35 antagonists as observed by crystallography (6,7), the latter two molecules being bound in a very similar fashion. More specifically, the F1 residue in our simulation is surrounded by Y131<sup>3,33</sup> and M134<sup>3,36</sup> from TM3, I219<sup>5,42</sup> from TM5, W276<sup>6,48</sup>, V279<sup>6,51</sup>, and V283<sup>6,55</sup> from TM6 (Fig. 5, upper panel). The poses of C24 (found by crystallography) and NCC (1–5) are compared in Fig. 6. The F1 of NCC lies approximately in the same location of the benzofuran-piperidine rings of C24, as expected, but the backbone nitrogen N(F1) is 5 Å closer to the center of the overall TM bundle than the N1 piperidine nitrogen

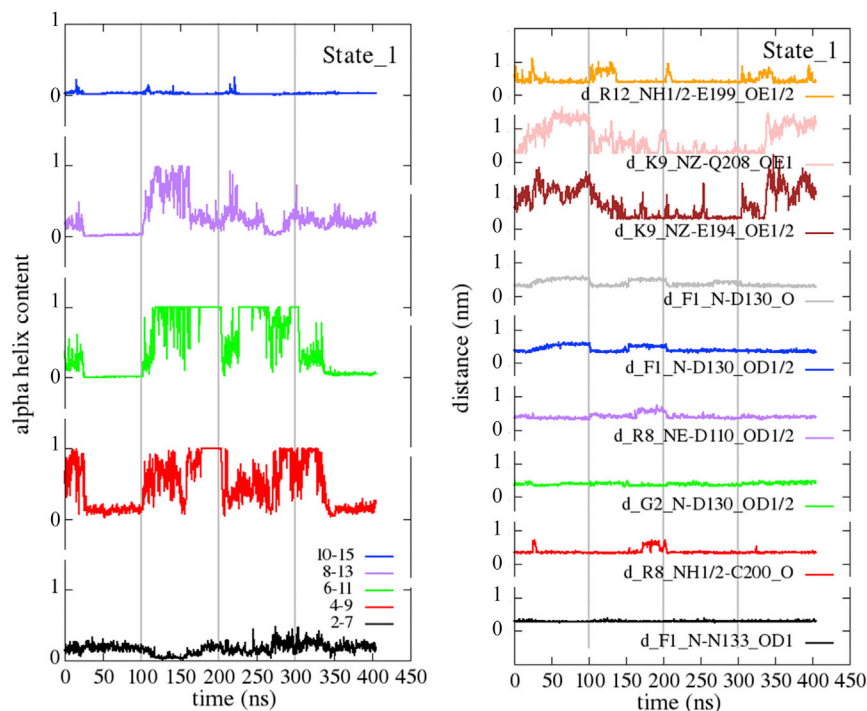

FIGURE 4 (Left panel)  $\alpha$ -helix content of different segments of NCC along classical MD trajectories starting from State\_1. Four independent MD trajectories (100 ns long, concatenated in the figures) were calculated starting from State\_1 and displayed as in Fig. 2. (Right panel) Evolution of the most stable hydrogen bonds along the same trajectories are shown. To see this figure in color, go online.

of C24, making it capable to make a stable hydrogen bond with the deeply buried OD1 of N133<sup>3,35</sup>, which is a residue included in the conserved 129–141 TM3 sequence (IDYYNMFTSTFTL) of the human opioid receptors. This arrangement of the message region of NCC also differs from the docking results shown by Thompson et al. (6) for the N-terminal tetrapeptide of the [Nphe1, Arg14, Lys15]-

**TABLE 1** List of the Most Stable Hydrogen Bonds between NOP and NCC Formed along Four Independent MD Trajectories Calculated Starting from State\_1

| NCC    |       | NOP     |       | Protein Location | Stability (Fraction) |
|--------|-------|---------|-------|------------------|----------------------|
| PHE-1  | N     | ASN-133 | OD1   | TM3_35           | 0.999                |
|        |       | ASP-130 | OD1/2 | TM3_32           | 0.562                |
|        |       | ASP-130 | O     | TM3_32           | 0.504                |
|        |       | GLY-308 | O     | TM7_42           | 0.172                |
|        |       | TYR-309 | OH    | TM7_43           | 0.166                |
| GLY-2  | N     | ASP-130 | OD1/2 | TM3_32           | 0.736                |
| GLY-3  | N     | ASP-130 | OD1/2 | TM3_32           | 0.289                |
|        |       | TYR-309 | OH    | TM7_43           | 0.224                |
| PHE-4  | N     | TYR-309 | OH    | TM7_43           | 0.184                |
| GLY-6  | O     | GLN-286 | NE2   | TM6_58           | 0.252                |
| ALA-7  | O     | ARG-302 | NH1/2 | TM7_36           | 0.160                |
| ARG-8  | NH1/2 | CYS-200 | O     | ECL2             | 0.889                |
|        |       | ASP-110 | OD1/2 | TM2_63           | 0.642                |
| LYS-9  | NZ    | GLU-194 | OE1/2 | ECL2             | 0.448                |
|        |       | GLN-208 | OE1   | ECL2             | 0.430                |
|        |       | GLN-208 | NE2   | ECL2             | 0.180                |
| SER-10 | OG    | PRO-292 | O     | ECL3             | 0.199                |
| ARG-12 | NH1/2 | GLU-199 | OE1/2 | ECL2             | 0.389                |
|        |       | GLU-199 | OE1/2 | ECL2             | 0.199                |
| LYS-13 | NZ    | GLU-194 | OE1/2 | ECL2             | 0.240                |

NCC peptide (named UFP-101), which is a known NOP antagonist. According to their docking calculations, the tetrapeptide (NPhe1-Gly2-Gly3-Phe4) portion of UFP-101, binds with a conformation very similar to C24, having the two aromatic rings of NPhe1 and Phe4 overlapped to the external aromatic groups of C24. The NPhe1 chemical modification is known to eliminate efficacy, whereas the L14R and N15K mutation are reported to increase potency and duration of action (32). Thus it is reasonable that the ability of NPhe1 to abolish efficacy would be in reinforcing its anchoring to D130<sup>3,32</sup> and avoiding to reach N133<sup>3,35</sup>, thus forming a complex so similar in structure, but also in lack of activity, to the known antagonists C24 and C35.

In this framework, the NCC interaction with NOP is different and with a longer segment of the TM3 helix than the C24 compound leading to interact with N133<sup>3,35</sup> beside D130<sup>3,32</sup>.

Comparing the poses of C24 and NCC (Fig. 6), the position of pirrolidine ring corresponding to the tail end of the C24 compound is closer to T5 of NCC rather than F4, which is oriented in an opposite direction, as a consequence of the sliding of the message domain deep inside the receptor during the METAD protocol. The aromatic group of F4 of NCC is maintained in this position pointing toward helices TM1, TM2, and TM7, within a hydrophobic environment including Y58<sup>1,39</sup>, Y309<sup>7,43</sup>, I54<sup>1,35</sup>, and A306<sup>7,40</sup> (Fig. 5, lower panel).

According to our calculations reported in Table 1, the donor backbone nitrogens of residues 1–4 of NCC are

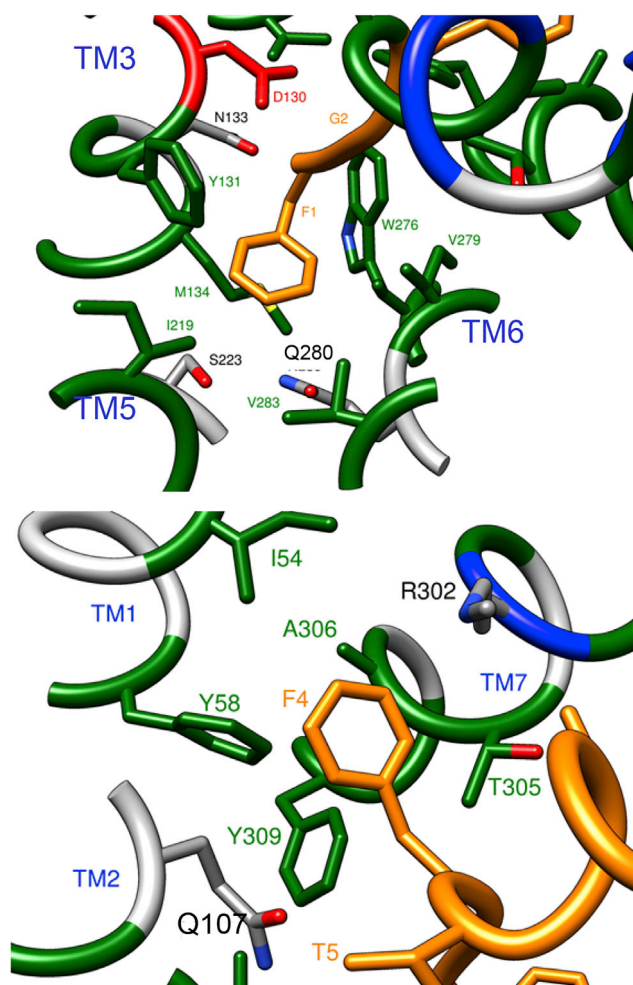

FIGURE 5 The hydrophobic environment where the message domain of NCC is docked (State\_1): NCC (orange), residues involved in hydrophobic interaction (green), positive residues (blue), and negative residues (red). To see this figure in color, go online.

surrounded by the acceptor oxygens of N133<sup>3,35</sup>, D130<sup>3,32</sup>, G308<sup>7,42</sup>, and Y309<sup>7,43</sup> and form hydrogen bonds with high stability. Moreover, the more stable bonds are formed between N(F1) and OD1 (N133<sup>3,35</sup>), 100% stable; NH1/2(R8) and O(C200<sup>ECL2</sup>), 89% stable; N(G2) and OD1/2(D130<sup>3,32</sup>), 74% stable; NE(R8) and OD1/2(D110<sup>2,63</sup>), 64% stable. The key aspartate D130<sup>3,32</sup> is further involved in hydrogen bonds with the N-terminal phenylalanine, N(F1)-OD1/OD2(D130<sup>3,32</sup>), 56% stable; and N(F1)-O(D130 (3,32)), 50% stable. Finally, the positively charged lysine K9 is involved in alternative H-bonds with two negative glutamate residues of ECL2: NZ(K9)-OE1/2(E194<sup>ECL2</sup>), 44% stable; and NZ(K9)-OE1(Q208<sup>ECL2</sup>), 44% stable. Fig. 7 shows the more stable hydrogen bonds in two different snapshots: the representative structure of State\_1 ( $t = 0$ , upper panel), and the structure corresponding to  $t = 260$  ns of the concatenated trajectory (lower panel) giving rise to the distance plot of Fig. 4 (when all of the more stable hydrogen bonds are formed).

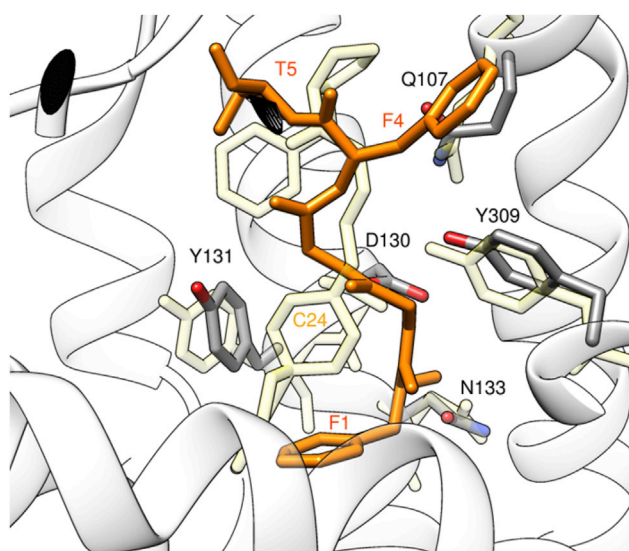

FIGURE 6 Comparison between the binding poses of the C24 mimetic compound seen by crystallography (light yellow; (6)) and NCC (orange; only residues 1–5, this study). To see this figure in color, go online.

Interestingly, in both the conformations represented in Fig. 7, the NCC fragment 8–13 containing the positively charged R8, K9, R12, and K13 strongly interacts with D110<sup>2,63</sup>, and with an electrostatic trap constituted by several negatively charged NOP residues within ECL2 (sequence 194–199, EDEEIE, specific for NOP), in agreement with fluorescence and NMR experiments on a model system of NOP\_NCC, based on synthetic peptides, reporting that ECL2 contributes to selective ligand binding with low affinity, essentially due to ionic interactions (33). The electrostatic field is stabilized by direct hydrogen bonds with C200<sup>ECL2</sup>, N208<sup>ECL2</sup>, and salt bridges with E194<sup>ECL2</sup> and E199<sup>ECL2</sup>. In particular, the H-bond between NH1/2(R8) of NCC and O(C200<sup>ECL2</sup>) is 90% stable along the repeated MD trajectories. The stacked positioning of the side chains of the acidic residue D110<sup>2,63</sup> and of the electrostatic trap of ECL, interacting with the positive residues of NCC (Fig. 7) favor an  $\alpha$ -helix conformation of the 6–12 segment of the agonist. Actually the  $\alpha$ -helix content of this segment interconverts several times during our calculated trajectories between a fully formed and a destructured one (compare upper panel and lower panel of Fig. 7; see also Fig. 4, left panel).

Thus, interactions of the address region of NCC with TM2 and ECL2 rather than with TM3,6,7 is in agreement with those of “nonclassical” opioids (10). According to this result, specificity of the ECL domains should contribute to NOP selectivity for NCC, even if further contributions from the so-called negative determinacy, i.e., selectivity due to negative interaction with other extracellular domains of the receptor (34,35) cannot be ruled out. Indeed, the comparison between the sequences of NCC and of the classical k-opioid dynorphin A (YGGFLRRIRPKLKWQ) shows

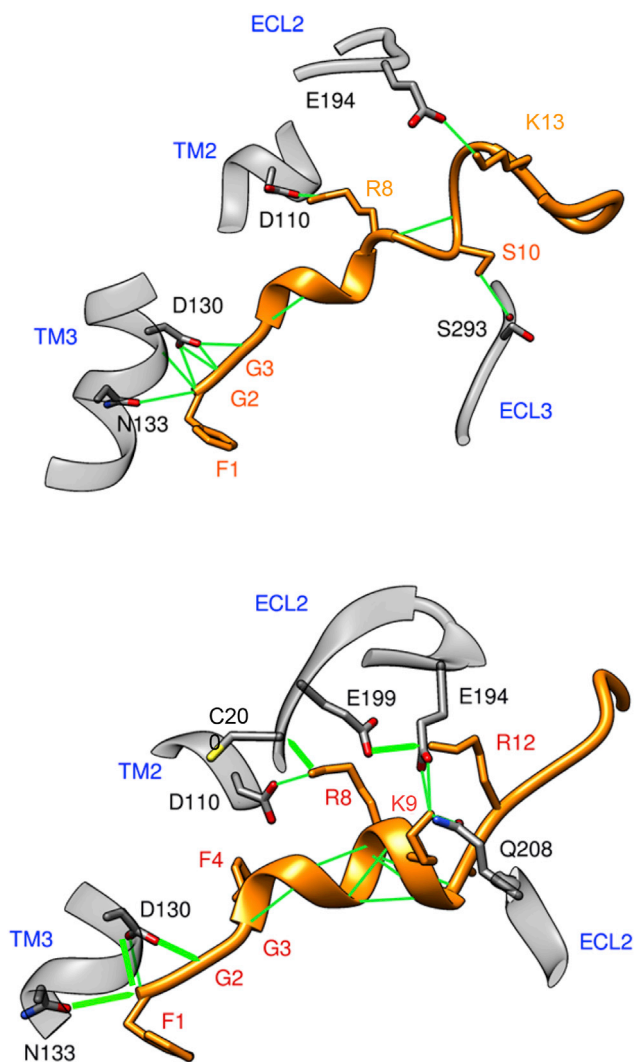

FIGURE 7 Most stable H-bonds between NCC (orange) and NOP. (Upper panel) State\_1 (representative structure) is shown. (Lower panel)  $t = 260$  ns of the concatenated trajectory giving rise to the distance plot of Fig. 4 is shown. At this time all the most stable H-bonds of Table 1 are formed. To see this figure in color, go online.

a proline residue at position 10 in the latter one, which has significant effects on the backbone conformation; thus it is likely to be crucial in lowering affinity for NOP with respect to the endogenous agonist. However, even the chimeric peptide obtained by substituting the six C-terminal residues of NCC (RKLANQ) with those of dynorphin (LKWDNQ) markedly impairs the affinity and activity profile toward NOP (36). As previously mentioned, the absence of the last four N-terminal residues in the synthetic fragment NCC(1–13)-NH<sub>2</sub> does not change its activity (31), thus the affinity impairment due to C-terminal substitution could be a negative-determinacy effect due to the presence of the bulky aromatic side chain of W14 and of the acidic side chain of D15, both of them disfavoring the interactions with the electrostatic trap of ECL2.

Our trajectories of State\_1 show a strong stability of the H-bonds between K9 and both C200<sup>ECL2</sup> and D110<sup>2,63</sup> (Table 1). The latter one could explain why the D110A point mutation affects the NCC potency the most with respect to other measured ones, e.g., D130A (6).

### The role of structural water

We have searched for the presence of structural waters in the binding pocket in the NOP\_NCC complex and in the NOP\_free, and compared our results in light of the reported x-ray structure of NOP\_C24 (PDB: 4EA3), in which four waters were found in proximity of the small molecule ligand (6) (Fig. 8, upper panel). We have calculated the water density around NCC along the four concatenated trajectories of Fig. 4 for State\_1 (Fig. 8, lower panel) and along a 100 ns trajectory of the NOP\_free structure (Fig. 8, central panel). Several density spots are visible as pink blobs in both simulation data sets, even though, as expected, in the absence of the endogenous ligand the wider space available in the pocket is more homogeneously filled with regions of high density of water. The water density in the NOP\_free simulation indicates the presence of some of the water molecules in the same positions as in the NOP\_C24 complex, including the one (W1) bridging N133<sup>3,35</sup> to D130<sup>3,32</sup>, with the important difference that the orientation of the amide group of N133<sup>3,35</sup> is flipped with respect to the crystallographic data. On the contrary the results of the simulation of the NOP\_NCC complex show a “dried” deep site where no water density is found below the F1 N-terminal head of NCC, and the orientation of the amide group of asparagine N133<sup>3,35</sup> is the same as in the NOP\_free receptor.

### NCC binding to the in silico mutant N133A of NOP

We have tested the effect of the N133A point mutation on the FES. In Fig. S4 the convergence of the METAD trajectory (upper panel), and the final 2D FES diagram (lower panel) are displayed as a function of the same variables, i.e., the  $\alpha$ -helix content of fragments 2–9 and 10–16 of NCC. The absolute minimum of the FES (State\_1 of the N133A mutant) is  $-202$  kJ/mol at position [0.12, 0.04] with an error of 0.04, i.e., the  $\alpha$ -helix content is negligible for the external segment, and very low for the internal one. The representative structures of State\_1 for the wild-type and the N133A mutant are compared in Fig. S5. Notably, the direct interaction of F1(NCC) with TM3 is reduced to a single H-bond with D130<sup>3,32</sup>, while the interaction between R8(NCC) and the D110<sup>2,63</sup>, E199<sup>ECL2</sup>, and C200<sup>ECL2</sup> of the electrostatic trap is conserved. The distributions of the distances  $d_{F1(NCC)-CG(D130)}$  and  $d_{F1(NCC)-CA(N/A133^{3,35})}$  along the two overall METAD runs leading to the FES diagrams are compared for the WT and the mutant (Fig. S5, lower panel), providing evidence that in the mutant, although NCC still



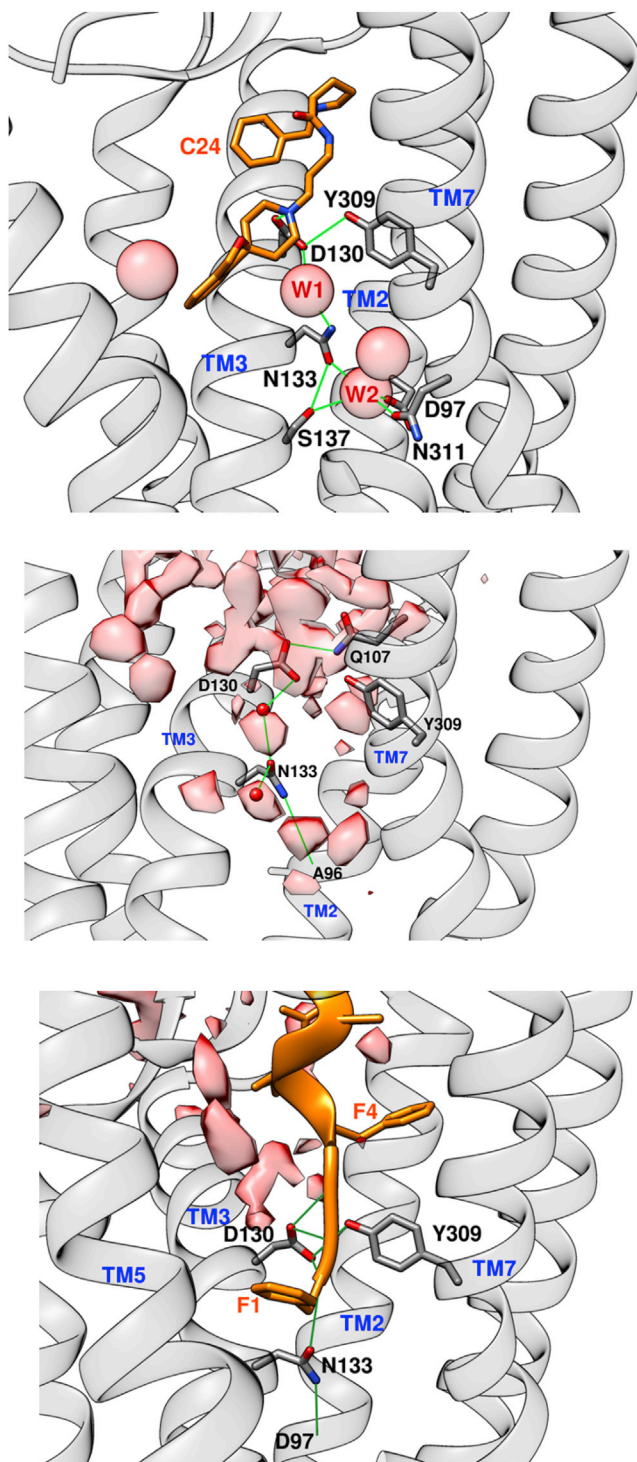

FIGURE 8 (Upper panel) H-bond network connecting C24 (PDB: 4EA3) to TM2,3,7. Water is depicted as pink spheres. (Central panel) Water-density (pink) and H-bond network calculated for NOP\_free are shown. (Lower panel) Water density and H-bond network for the NOP\_NCC complex are shown. A flip between the oxygen and nitrogen amide atoms of N133<sup>3,35</sup> could act as a microswitch for the equilibrium between the active and inactive form of the receptor. To see this figure in color, go online.

forms one H-bond with D130<sup>3,32</sup>, the NCC backbone penetrates  $\sim 5$  Å less inside the binding pocket, forming alternative H-bonds with V279<sup>6,51</sup>, R302<sup>7,36</sup>, and T305<sup>7,39</sup>. In Fig. S6, the water density calculated for a cluster of  $\sim 100$  structures around the absolute minimum of the FES diagram (State\_0 of the N133A mutant) is shown to be comparable with analogous pictures of Fig. 8: without the formation of the N(F1)-OD1(N133<sup>3,35</sup>) bond, water penetrates deeper than in the WT NOP-NCC complex (Fig. 8, lower panel), restoring part of the water-bridge interactions observed for the NOP\_free receptor (Fig. 8, central panel), and the NOP-C24 complex (Fig. 8, upper panel).

## DISCUSSION

In this study, a dynamic representation of NCC binding to the inactive form of NOP has been obtained. From this picture, clues to the very first events of the inactive to active transition can be searched for, the action mechanism being still unknown. The results of our simulations suggest that residue N133<sup>3,35</sup> could have a role in modulating the equilibrium between inactive and active conformations of NOP. In the crystal structure of the NOP\_C24 complex, N133<sup>3,35</sup> lies in an extended hydrogen bonding network, including direct interactions with S137<sup>3,39</sup>, T136<sup>3,38</sup>, and I129<sup>3,31</sup>, and water-bridged to D130<sup>3,32</sup>, S137<sup>3,39</sup>, N311<sup>7,45</sup>, S312<sup>7,46</sup>, D97<sup>2,50</sup>, and G308<sup>7,42</sup>. As shown in Fig. 8 (upper panel), a water bridge (molecule W1) between D130<sup>3,32</sup> and N133<sup>3,35</sup> maintains the amidic nitrogen of N133<sup>3,35</sup> pointing toward the extracellular side, while the amidic oxygen, hydrogen-bonded to the donor oxygen of the side chain of S137<sup>3,39</sup> and to another water molecule (W2), points toward the center of the TM bundle. In particular this second water molecule is hydrogen-bonded to other well-conserved residues, S137<sup>3,39</sup>, D97<sup>2,50</sup>, and N311<sup>7,45</sup>, in a position that in the structure of the delta opioid receptor reported by crystallography, is occupied by a sodium ion (37) (PDB: 4N6H). The role of sodium as negative modulator of agonist binding in opioid receptors (38), and in particular in NOP (39,40) is well known and its positioning within NOP, in place of water W2, is therefore very likely.

The F1 of NCC occupies a position closer to N133<sup>3,35</sup>, approximately the same as water W1 as shown in the crystal structure of NOP\_C24, and compatible with the water density calculated along the simulation of the NOP\_free; the amidic oxygen of N133<sup>3,35</sup> is directly hydrogen-bonded to N(F1) and the asparagine is no longer water-bridged to D130<sup>3,32</sup>. Therefore, we suggest that the orientation of the amide group of N133<sup>3,35</sup> is a molecular microswitch that triggers the readjustment of the overall H-bond network between active and inactive conformations of the NOP receptor. This perturbation includes a destabilization of the segment 134–137 of TM3, conserved in the opioid receptor

family, as shown by the analysis of the fraction of formation of the hydrogen bonds in NOP\_C24, NOP\_free, and NOP\_NCC (Fig. S7). Thus, although there is no direct link between N133<sup>3,35</sup> and the helices 5,6,7 (thought to be co-involved in the transition toward the active conformation), the perturbation of an extended segment of TM3 helix in the inner core, and a rearrangement of water-mediated hydrogen bond network close to the extracellular side of the receptor, could act as a trigger as well.

These results, together with the N133A in silico mutant data that show a higher distance between F1(NCC) and the mutated residue, as compared with the WT receptor, further support the proposed central role of N133<sup>3,35</sup> as a microswitch involved in balancing the equilibrium between inactive and active states of the receptor. However, our investigations are limited to the nanosecond timescale, and further evidence can be given only by either experiments providing functional data on this mutant, or longer MD trajectories in the microsecond time window or more.

According to the microswitch hypothesis, we can provide a mechanistic explanation of the negative allosteric effect of sodium for agonist binding to NOP. In the simulation of NOP\_free, the amide group of N133<sup>3,35</sup> is oriented similar to the agonist bound form, with the amidic nitrogen ND2 hydrogen-bonded to A96<sup>2,49</sup>. The replacement of the water W2 with the positively charged Na<sup>+</sup> ion positioned in the site surrounded by S137<sup>3,39</sup>, D97<sup>2,50</sup>, and N133<sup>3,35</sup> (conserved among human opioid receptors) should stabilize the inactive configuration by attracting the partially negative charge of the amidic OD1, and repelling the partially positive charge of ND2, i.e., by inverting the orientation of the amide group of N133<sup>3,35</sup>. The rotation of the amide group and the readjustment of the overall surrounding water network would impair the formation of the N(F1)-OD1(N133<sup>3,35</sup>) hydrogen bond leading to the NOP-agonist complex. Our proposed explanation of the allosteric mechanism is fully supported by a 100 ns MD simulation of the NOP\_C24 complex where water W2 has been replaced by a sodium ion (Fig. S8). The sodium ion is quite stable in this position, forming several salt bridges as illustrated in the figure, and especially, as supposed, a 91% stable salt bridge with OD1(N133<sup>3,35</sup>). On the contrary in the presence of the agonist and in the absence of the Na<sup>+</sup> ion, the binding of the message domain of the agonist deeply inside the hydrophobic pocket would be favored, leading to collapse of the binding pocket with the extrusion of the inner structural waters, and with a possible shift of the equilibrium between the inactive and active conformations of the receptor toward the active one.

## CONCLUSIONS

In conclusion, we have obtained a dynamical picture of the binding of NCC to the inactive state of NOP by the free-energy profiles as a function of the  $\alpha$ -helix content of different

segments of NCC, provided by METAD. The main structural features we have found are in agreement with the overall set of functional data derived after point mutations. The pose of the message domain (residues 1–4) of NCC has been found as slightly slipped deeper inside the TM bundle with respect to the known antagonists, and the new position allows a mechanistic explanation of the negative allosteric effect by Na<sup>+</sup> ion, for which a very likely location inside the TM bundle has been identified. A residual  $\alpha$ -helix content in the central part of the NCC peptide (residues 4–9) is maintained, whereas the C-terminal segment (residues 13–17) is unstructured, highly flexible but dynamically connected to the ECL2 domain in agreement to the importance of this external loop in the selection of the endogenous ligand. A pivotal role for residue N133<sup>3,35</sup> is suggested and corroborated by the results of the in silico mutant N133A, as a molecular microswitch that could perturb the equilibrium between the active and inactive NOP conformations, in the framework of an extended H-bond network rearrangement, including several solvent waters present in the deep binding site. Clearly, single-point mutation experiments on the key residue identified by this study could prove useful.

## SUPPORTING MATERIAL

Eight figures are available at [http://www.biophysj.org/biophysj/supplemental/S0006-3495\(16\)30521-5](http://www.biophysj.org/biophysj/supplemental/S0006-3495(16)30521-5).

## AUTHOR CONTRIBUTIONS

S.D.L. conceived the idea for the project, conducted all the bioinformatic tools, analyzed the results, and wrote the article; A.A. analyzed the results and wrote the article.

## ACKNOWLEDGMENTS

We thank Dr. Isabella Baccarelli and Dr. Nicola Spallanzani of the CINECA supercomputing centers for their help in the initial setup of calculations.

This work was supported in whole or part by Italian Ministry of University and Research (LINEA D1 Università Cattolica del Sacro Cuore) and by the CINECA supercomputing centers through the grant IsC34 (n.HP10CWX60F).

## REFERENCES

1. Meunier, J. C., C. Mollereau, ..., J. Costentin. 1995. Isolation and structure of the endogenous agonist of opioid receptor-like ORL<sub>1</sub> receptor. *Nature*. 377:532–535.
2. Reinscheid, R. K., H. P. Nothacker, ..., O. Civelli. 1995. Orphanin FQ: a neuropeptide that activates an opioidlike G protein-coupled receptor. *Science*. 270:792–794.
3. Chiou, L. C., Y. Y. Liao, ..., E. P. Prinssen. 2007. Nociceptin/orphanin FQ peptide receptors: pharmacology and clinical implications. *Curr. Drug Targets*. 8:117–135.
4. Mogil, J. S., and G. W. Pasternak. 2001. The molecular and behavioral pharmacology of the orphanin FQ/nociceptin peptide and receptor family. *Pharmacol. Rev.* 53:381–415.

5. Lambert, D. G. 2008. The nociceptin/orphanin FQ receptor: a target with broad therapeutic potential. *Nat. Rev. Drug Discov.* 7:694–710.
6. Thompson, A. A., W. Liu, ..., R. C. Stevens. 2012. Structure of the nociceptin/orphanin FQ receptor in complex with a peptide mimetic. *Nature.* 485:395–399.
7. Miller, R. L., A. A. Thompson, ..., R. C. Stevens. 2015. The importance of ligand-receptor conformational pairs in stabilization: spotlight on the N/OFQ G protein-coupled receptor. *Structure.* 23:2291–2299.
8. Kobilka, B. K., and X. Deupi. 2007. Conformational complexity of G-protein-coupled receptors. *Trends Pharmacol. Sci.* 28:397–406.
9. Orsini, M. J., I. Nesmelova, ..., K. H. Mayo. 2005. The nociceptin pharmacophore site for opioid receptor binding derived from the NMR structure and bioactivity relationships. *J. Biol. Chem.* 280: 8134–8142.
10. Filizola, M., and L. A. Devi. 2012. Structural biology: how opioid drugs bind to receptors. *Nature.* 485:314–317.
11. Kothandan, G., C. G. Gadhe, ..., S. J. Cho. 2014. The nociceptin receptor (NOPR) and its interaction with clinically important agonist molecules: a membrane molecular dynamics simulation study. *Mol. Biosyst.* 10:3188–3198.
12. Yakovleva, T., I. Bazov, ..., G. Bakalkin. 2006. Prodynorphin storage and processing in axon terminals and dendrites. *FASEB J.* 20:2124–2126.
13. Pietrucci, F., and A. Laio. 2009. A collective variable for the efficient exploration of protein beta-structures with metadynamics: application to SH3 and GB1. *J. Chem. Theory Comput.* 5:2197–2201.
14. Ballesteros, J., and H. Weinstein. 1995. Integrated Methods for the Construction of Three Dimensional Models and Computational Probing of Structure Function Relations in G Protein-Coupled Receptors. Academic Press, San Diego, CA.
15. Pettersen, E. F., T. D. Goddard, ..., T. E. Ferrin. 2004. UCSF Chimera—a visualization system for exploratory research and analysis. *J. Comput. Chem.* 25:1605–1612.
16. Pierce, B. G., K. Wiehe, ..., Z. Weng. 2014. ZDOCK server: interactive docking prediction of protein-protein complexes and symmetric multimers. *Bioinformatics.* 30:1771–1773.
17. Venkatakrishnan, A. J., X. Deupi, ..., M. M. Babu. 2013. Molecular signatures of G-protein-coupled receptors. *Nature.* 494:185–194.
18. Berendsen, H. J. C., D. van der Spoel, and R. van Drunen. 1995. GROMACS: a message-passing parallel molecular dynamics implementation. *Comput. Phys. Commun.* 91:43–56.
19. Hess, B., C. Kutzner, ..., E. Lindahl. 2008. GROMACS 4: algorithms for highly efficient, load-balanced, and scalable molecular simulation. *J. Chem. Theory Comput.* 4:435–447.
20. Chen, C., J. Ke, ..., K. Melcher. 2013. Structural basis for molecular recognition of folic acid by folate receptors. *Nature.* 500:486–489.
21. Tribello, G. A., M. Bonomi, ..., G. Bussi. 2014. Plumed 2.0: new feathers for an old bird. *Comput. Phys. Commun.* 185:604–613.
22. Nosé, S. 1984. A unified formulation of the constant temperature molecular-dynamics methods. *J. Chem. Phys.* 81:511–519.
23. Hoover, W. G. 1985. Canonical dynamics: equilibrium phase-space distributions. *Phys. Rev. A Gen. Phys.* 31:1695–1697.
24. Parrinello, M., and A. Rahman. 1981. Polymorphic transitions in single crystals: a new molecular dynamics method. *J. Appl. Phys.* 52:7182–7190.
25. Laio, A., and M. Parrinello. 2002. Escaping free-energy minima. *Proc. Natl. Acad. Sci. USA.* 99:12562–12566.
26. Bonomi, M., and M. Parrinello. 2010. Enhanced sampling in the well-tempered ensemble. *Phys. Rev. Lett.* 104:190601.
27. Laio, A., A. Rodriguez-Fortea, ..., M. Parrinello. 2005. Assessing the accuracy of metadynamics. *J. Phys. Chem. B.* 109:6714–6721.
28. Daura, X., K. Gademann, ..., A. E. Mark. 1999. Peptide folding: when simulation meets experiment. *Angew. Chem. Int.* 38:236–240.
29. O'Connor, C., K. L. White, ..., A. Milon. 2015. NMR structure and dynamics of the agonist dynorphin peptide bound to the human kappa opioid receptor. *Proc. Natl. Acad. Sci. USA.* 112:11852–11857.
30. Butour, J. L., C. Moisand, ..., J. C. Meunier. 1997. Recognition and activation of the opioid receptor-like ORL 1 receptor by nociceptin, nociceptin analogs and opioids. *Eur. J. Pharmacol.* 321:97–103.
31. Guerrini, R., G. Calo, ..., D. Regoli. 1997. Address and message sequences for the nociceptin receptor: a structure-activity study of nociceptin-(1-13)-peptide amide. *J. Med. Chem.* 40:1789–1793.
32. Calo, G., R. Guerrini, ..., D. Regoli. 2005. UFP-101, a peptide antagonist selective for the nociceptin/orphanin FQ receptor. *CNS Drug Rev.* 11:97–112.
33. Vincent, B., L. Mouledous, ..., P. Demange. 2008. Description of the low-affinity interaction between nociceptin and the second extracellular loop of its receptor by fluorescence and NMR spectroscopies. *J. Pept. Sci.* 14:1183–1194.
34. Moyle, W. R., R. K. Campbell, ..., X. Wang. 1994. Co-evolution of ligand-receptor pairs. *Nature.* 368:251–255.
35. Metzger, T. G., and D. M. Ferguson. 1995. On the role of extracellular loops of opioid receptors in conferring ligand selectivity. *FEBS Lett.* 375:1–4.
36. Lapalu, S., C. Moisand, ..., J. C. Meunier. 1997. Comparison of the structure-activity relationships of nociceptin and dynorphin A using chimeric peptides. *FEBS Lett.* 417:333–336.
37. Granier, S., A. Manglik, ..., B. K. Kobilka. 2012. Structure of the  $\delta$ -opioid receptor bound to naltrindole. *Nature.* 485:400–404.
38. Pert, C. B., G. Pasternak, and S. H. Snyder. 1973. Opiate agonists and antagonists discriminated by receptor binding in brain. *Science.* 182:1359–1361.
39. Ardati, A., R. A. Henningsen, ..., F. J. Monsma, Jr. 1997. Interaction of [3H]orphanin FQ and 125I-Tyr14-orphanin FQ with the orphanin FQ receptor: kinetics and modulation by cations and guanine nucleotides. *Mol. Pharmacol.* 51:816–824.
40. Mahmoud, S., W. Margas, ..., V. Ruiz-Velasco. 2010. Modulation of silent and constitutively active nociceptin/orphanin FQ receptors by potent receptor antagonists and Na<sup>+</sup> ions in rat sympathetic neurons. *Mol. Pharmacol.* 77:804–817.

**Biophysical Journal, Volume 111**

**Supplemental Information**

**A Dynamic Picture of the Early Events in Nociceptin Binding to the NOP  
Receptor by Metadynamics**

**Stefano della Longa and Alessandro Arcovito**

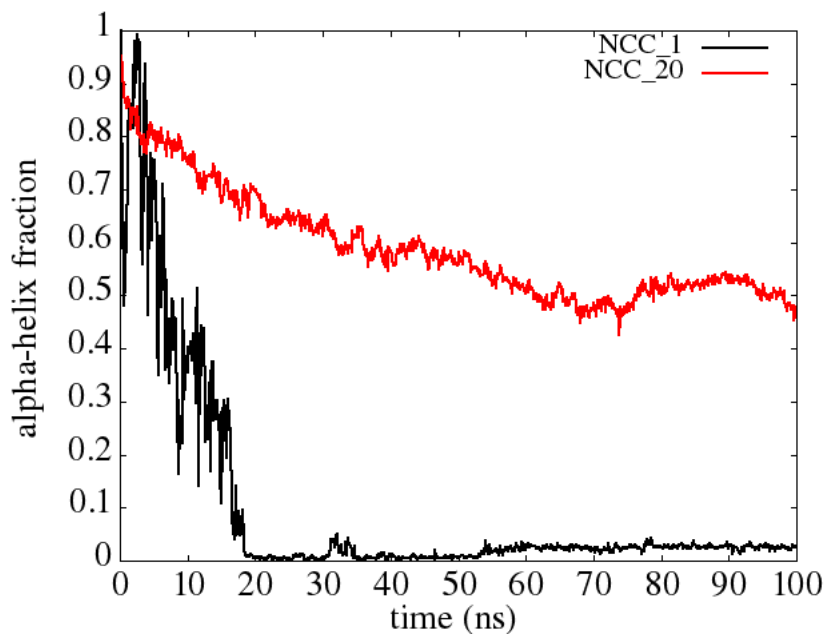

**Fig. S1.** Fraction of  $\alpha$ -helix content of NCC in water starting either from a single molecule (black curve), or a cluster of 20 NCC molecules (red curve) per 1600 water molecules. A partial  $\alpha$ -helix content is maintained much longer for clustered NCC molecules

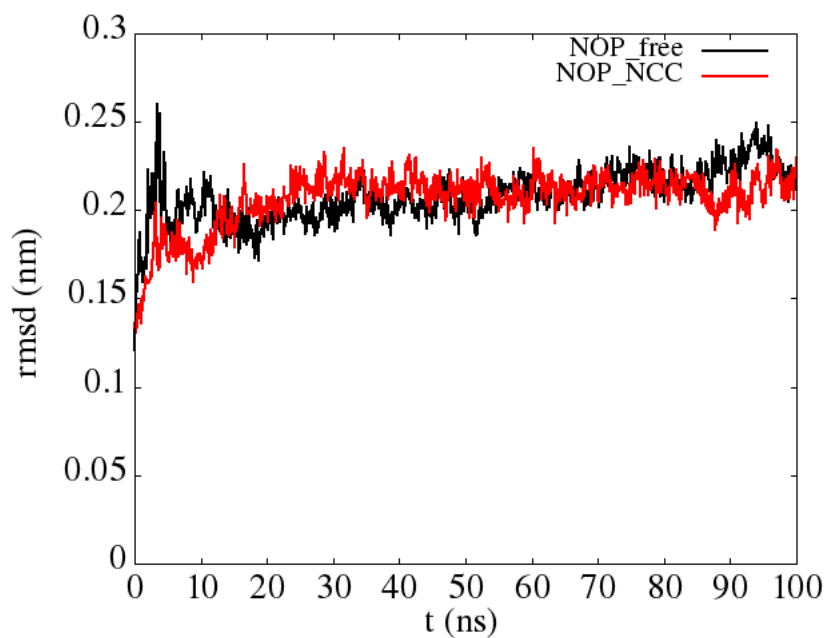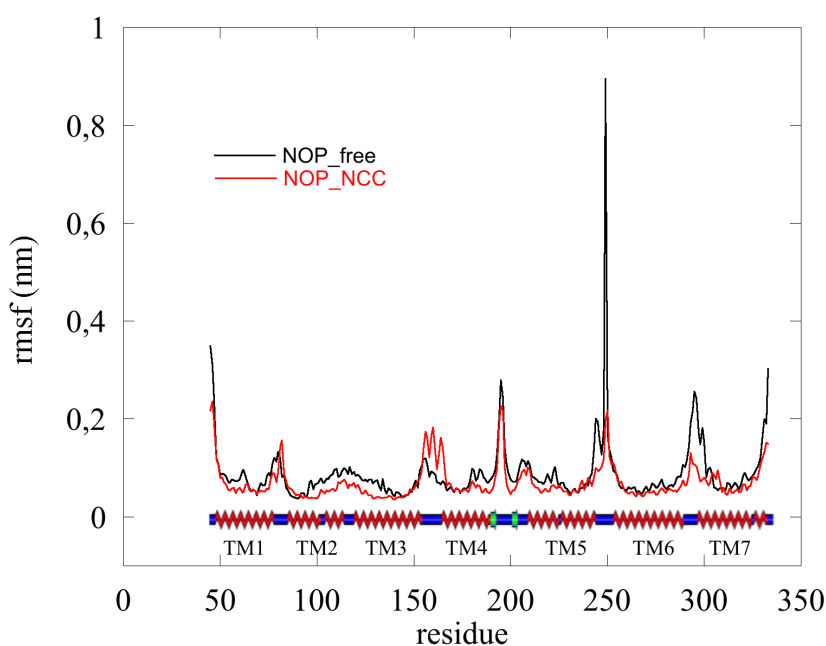

**Fig. S2.** Upper panel) RMSD plot of a 100 ns trajectory for free (black curve) and NCC bound (red curve) NOP. Lower panel) RMSF of residues of the same molecules. The NOP\_NCC structure is the starting one obtained by rigid docking, before metadynamics.

A)

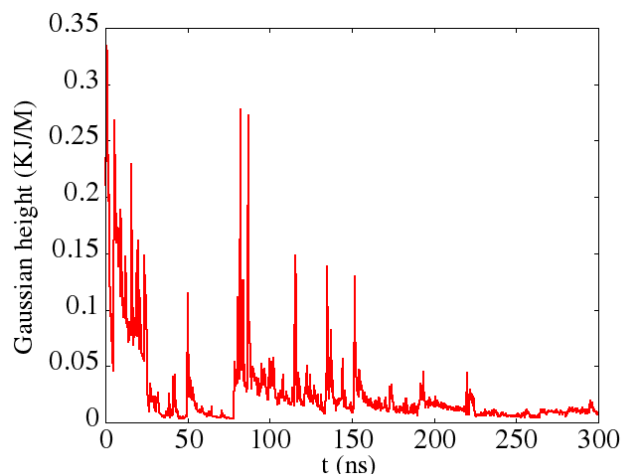

B)

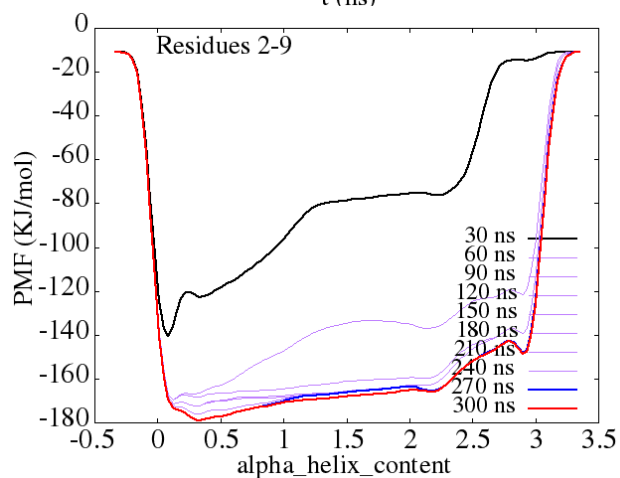

C)

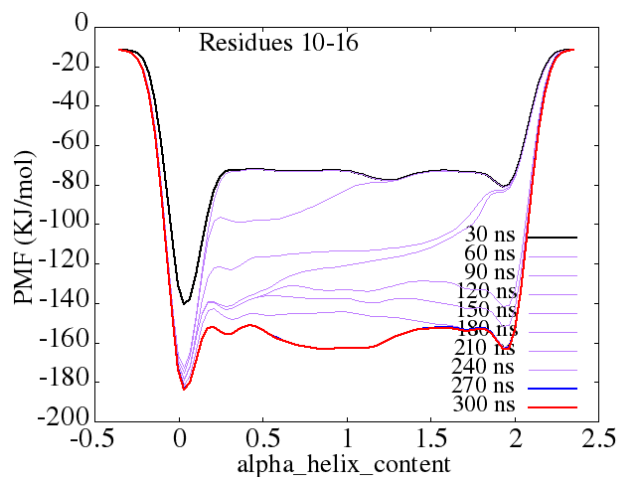

**Fig. S3.** Well-tempered metadynamics of the NOP\_NCC complex as a function of NCC  $\alpha$ -helix content. A) Gaussian heights added along the trajectory. B) and C) Projections of the FES averaged along the first and second collective variable, respectively.

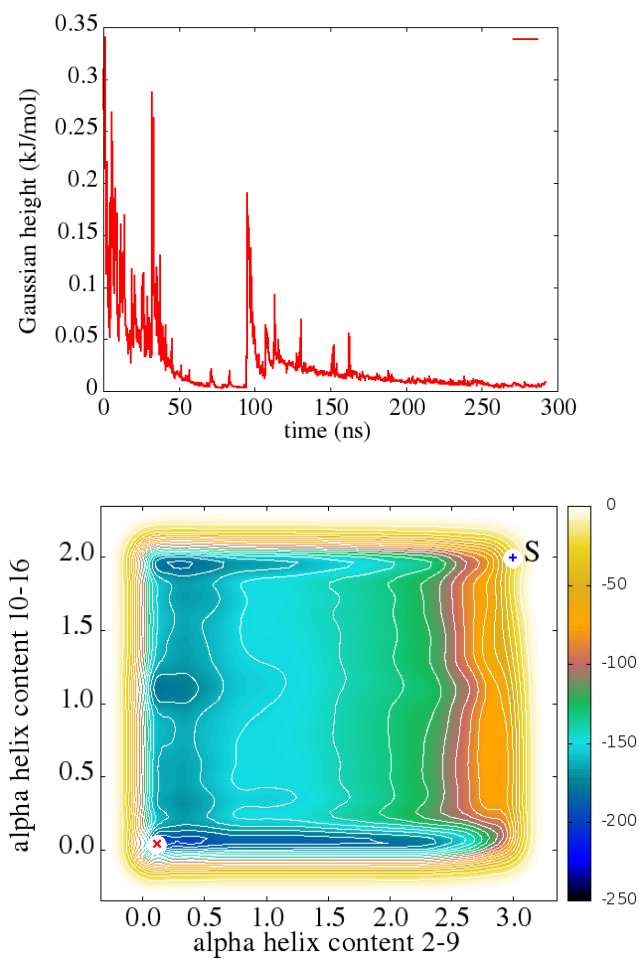

**Fig. S4.** Well-tempered metadynamics of the N133A 'in silico' mutant as a function of NCC  $\alpha$ -helix content. A) Gaussian heights added along the trajectory. B) Bidimensional FES .



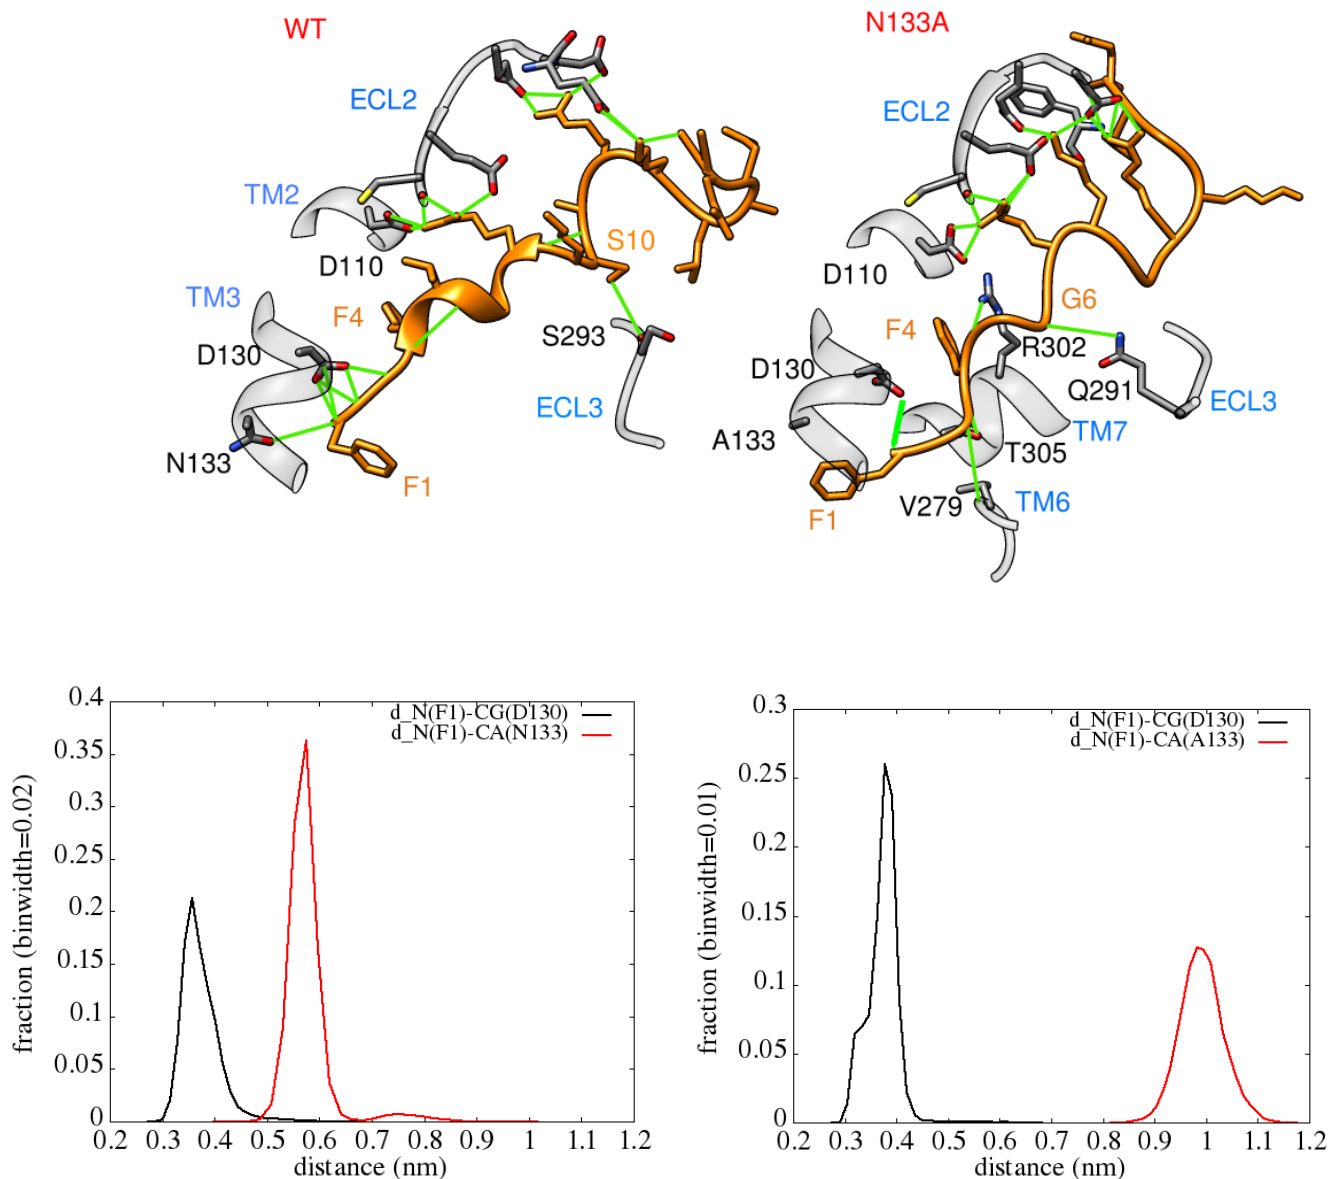

**Fig. S5.** Comparison between the representative structures corresponding to the FES absolute minima (State<sub>1</sub>) obtained for the WT (left) and N133A 'in silico' mutant (right) NOP-NCC complex. The distributions of the distances  $d_{N(F1)-CG(D130)}$  and  $d_{N(F1)-CA(N/A133)}$  along the metadynamics trajectory is shown in the bottom frames, showing that in the absence of the N133 bond, NCC still forms H-bond with D130, but penetrates less inside the binding pocket.

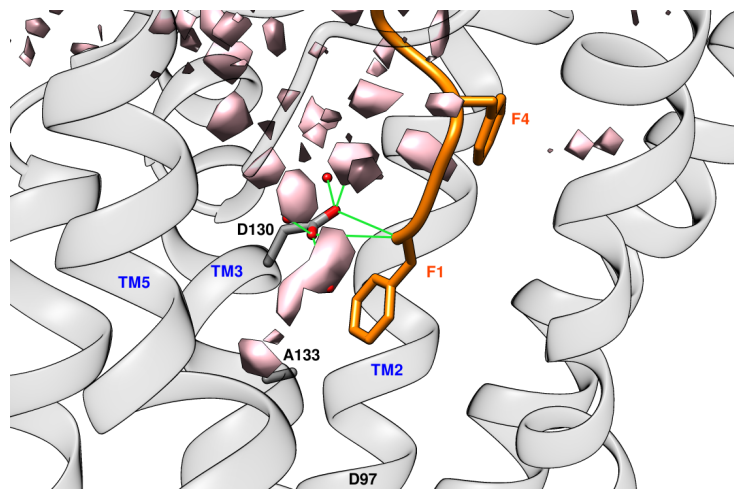

**Fig. S6.** Water density (pink) and H-bond network calculated for the N133A NOP-NCC complex: In the absence of the N(F1)-OD1(N133) bond, water penetrates deeper inside the binding site, restoring interactions with D130.

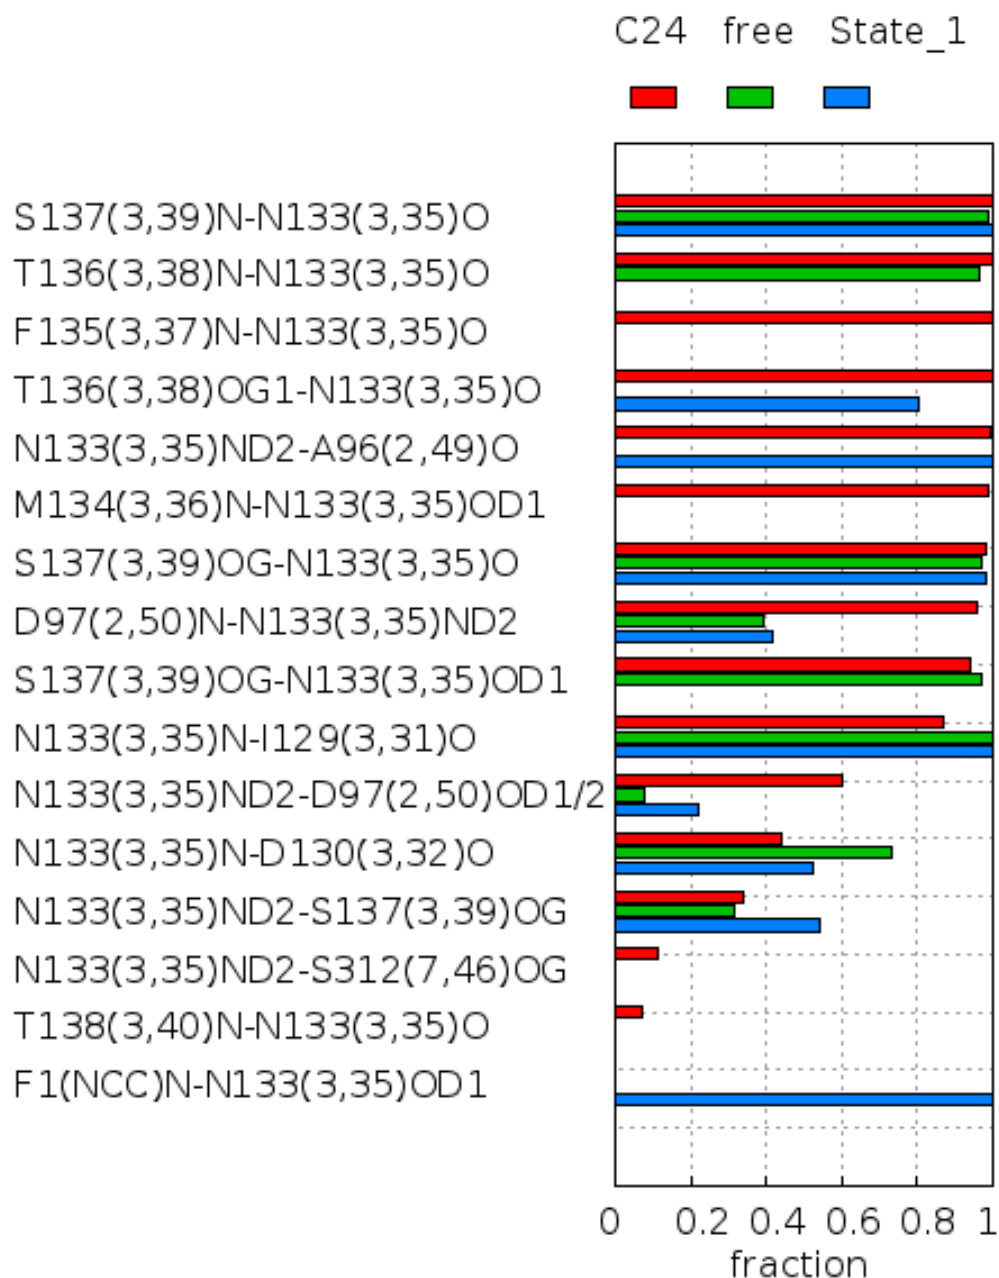

**Fig. S7.** Hydrogen bonds formed by N133 along the trajectories of NOP-C24 complex (red), NOP\_free (green) and NOP-NCC (cyan). Values of persistence of the H-bonds in the histogram are expressed as fraction of the trajectory. The histogram enlightens the destabilization of H-bonds between N133 and (M134, F135, T136) i.e. the perturbation of the TM3 helix segment in the NOP-NCC complex

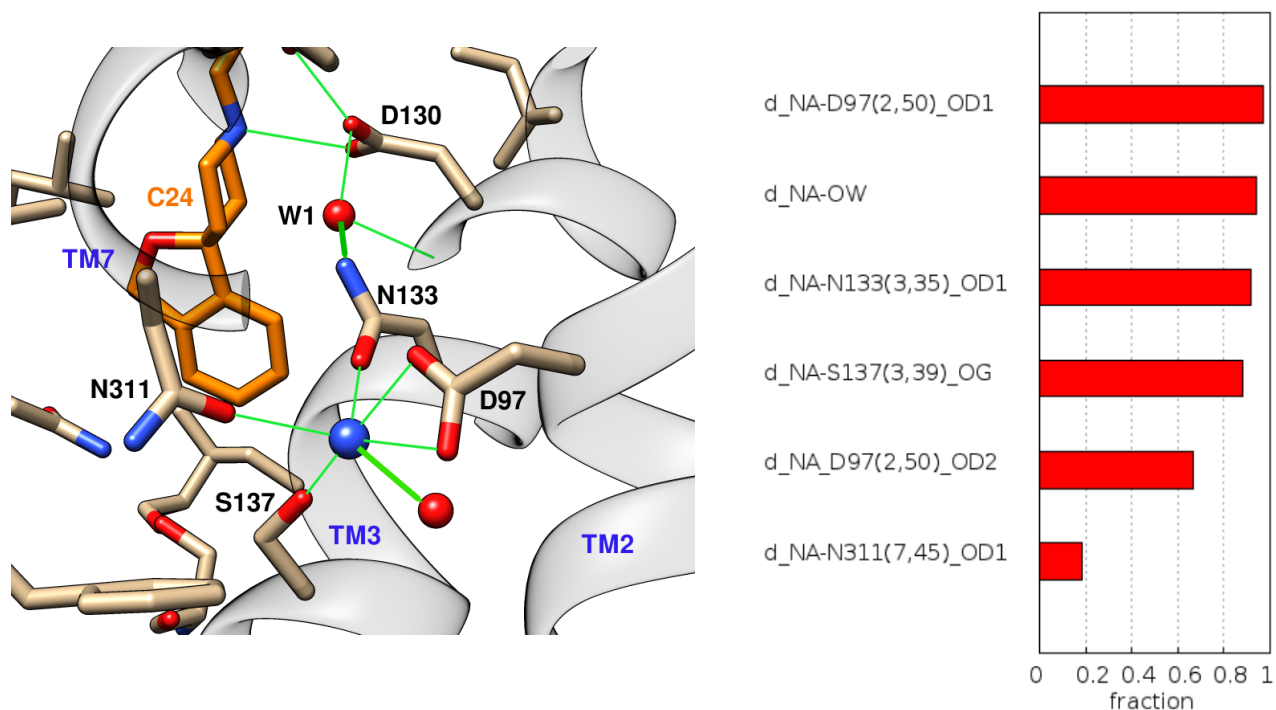

**Fig. S8.** Stability of the proposed allosteric binding site of sodium (colored blue), as probed by 100 ns MD of the NOP\_C24 complex: the sodium ion has been put in place of water W2 (left panel). As shown in the right panel, it forms a quite stable (91%) salt bridge with N133(3,35), with D97(2,50) (OD1 97%, OD2 67%), S137(3,39)\_OG (88%), N311(7,45)\_OD1 (18%), and with another structural water molecule (93%).
